# Supplementary material
Source: ML conference proceedings conference paper supplement (https://openreview.net/forum?id=IEMLNF4gK4)

$1e-1$  SII, STI, and FSI for SOUM ( $s_0 = 1$ ,  $d = 30$ )

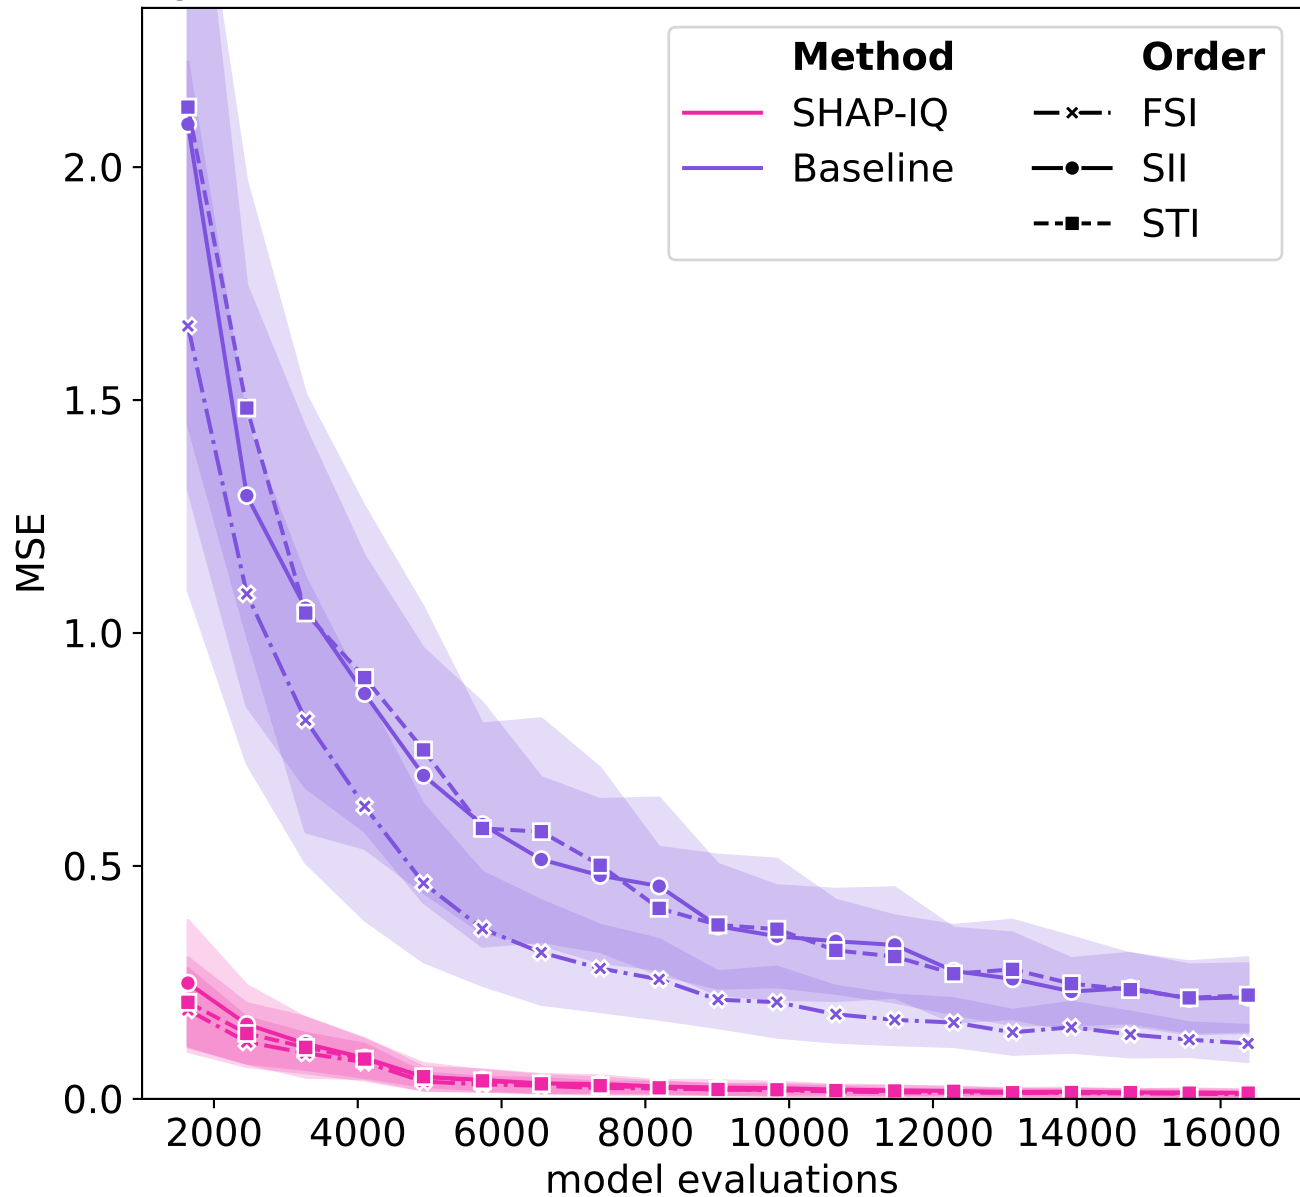

Supplement: supplementary_material [file attachment]

$1e^{-1}$  SII, STI, and FSI for LM ( $s_0 = 3, d = 14$ )

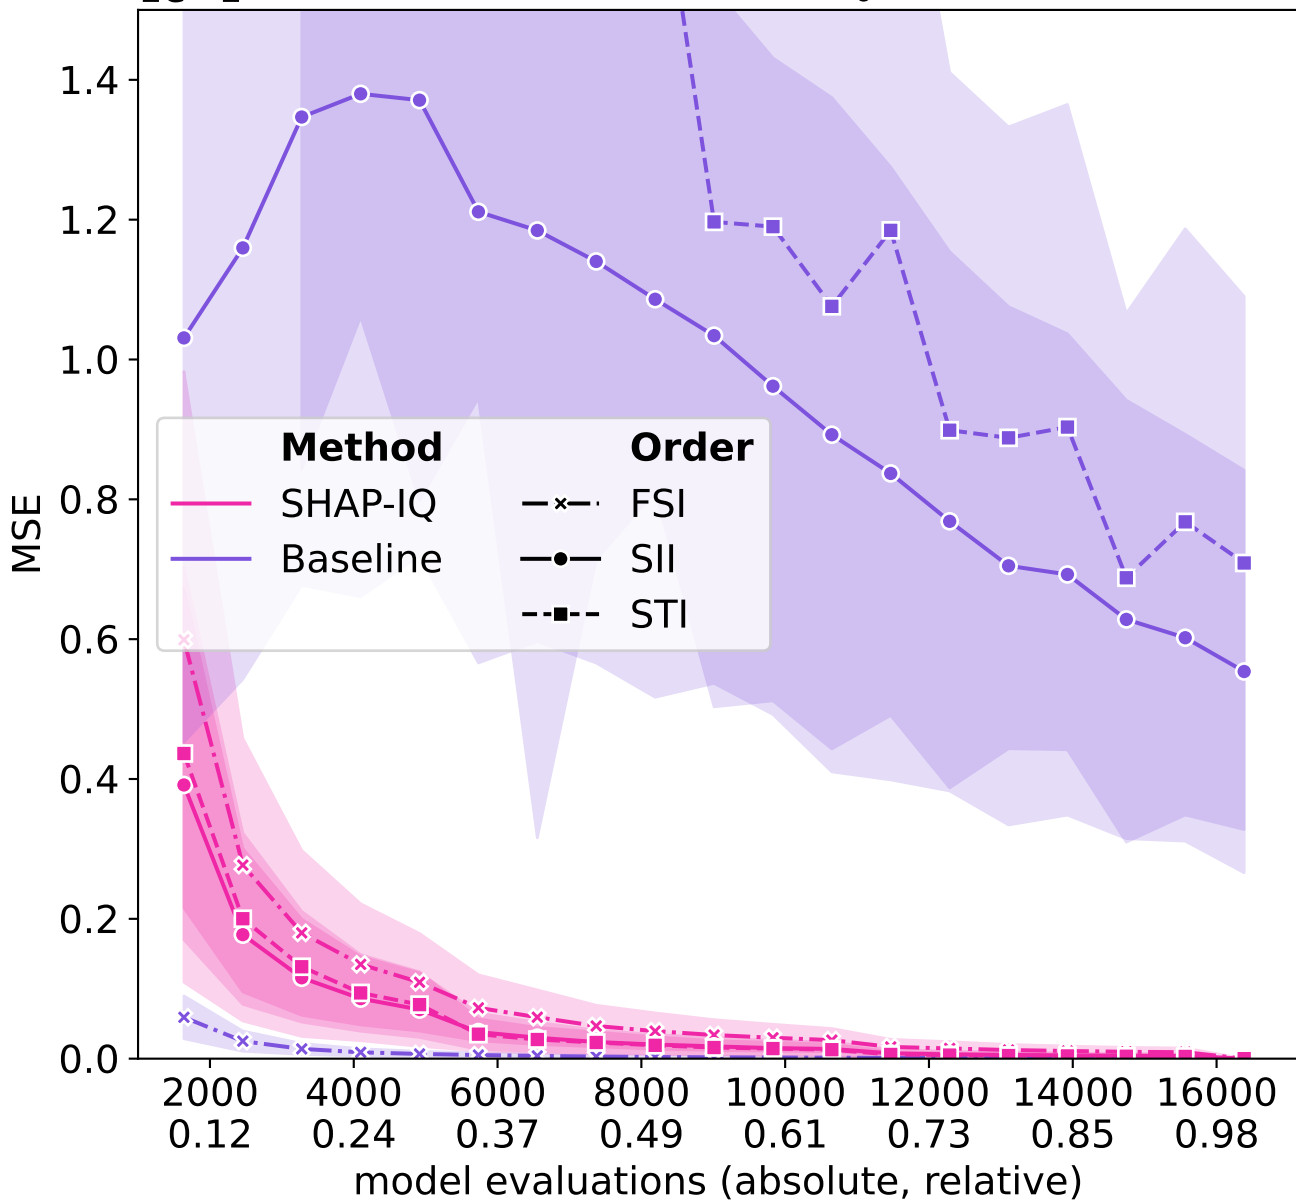

Supplement: supplementary_material [file attachment]

$1e^{-3}$  SII, STI, and FSI for ICM ( $s_0 = 2$ ,  $d = 14$ )

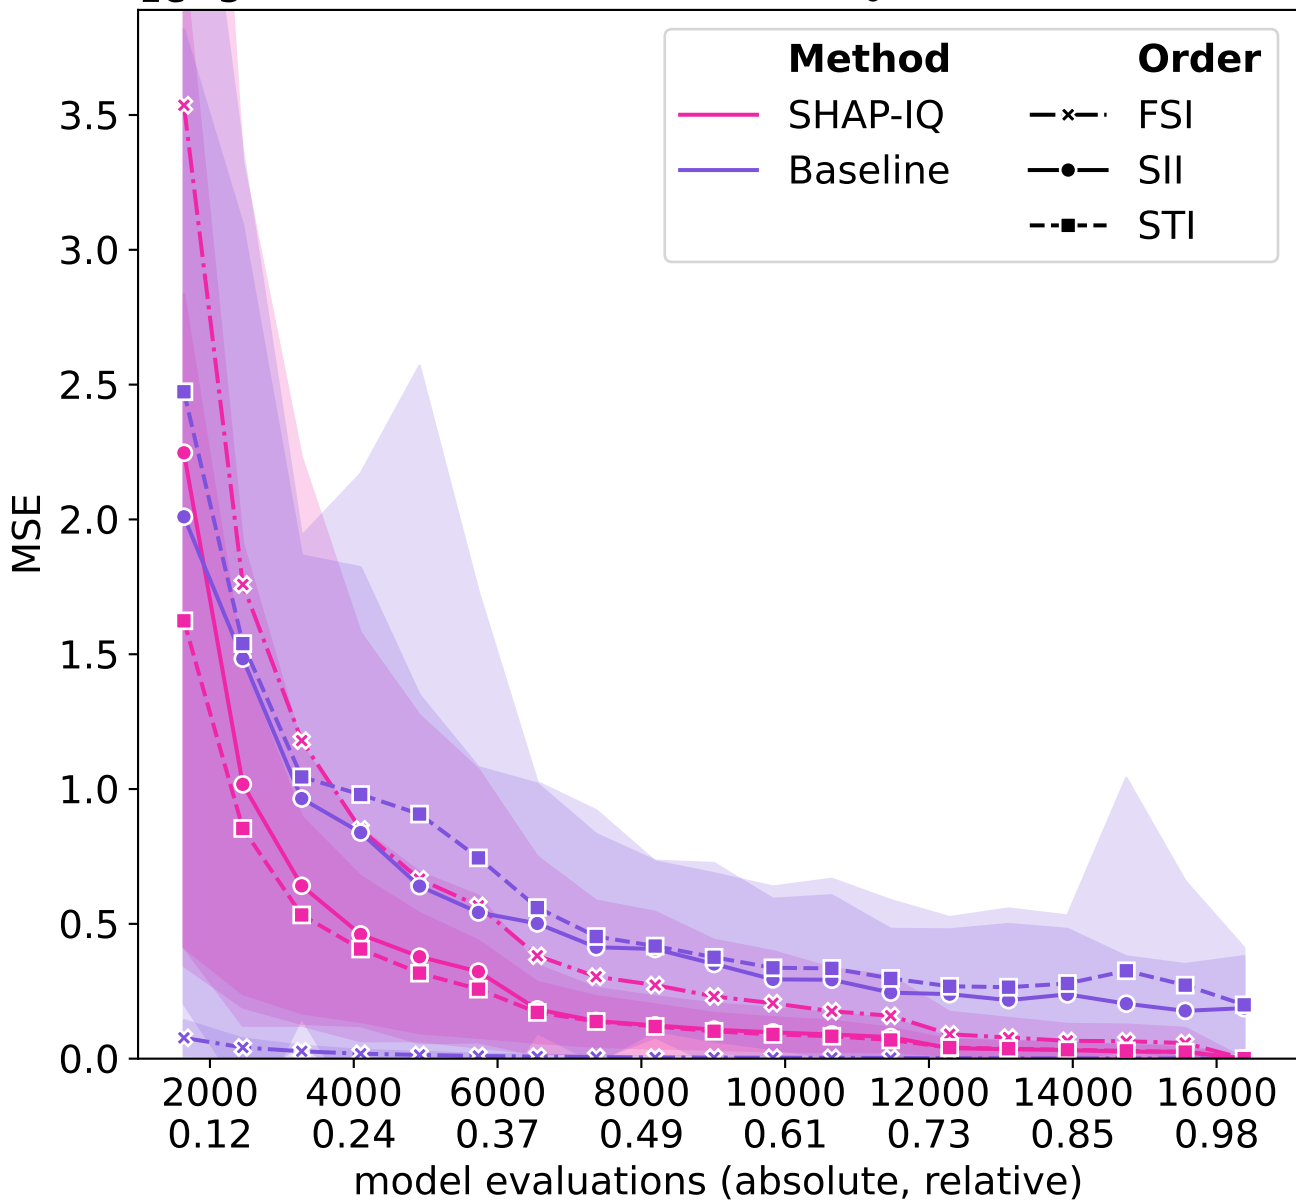

Supplement: supplementary_material [file attachment]

SII, STI, and FSI for LM ( $s_0 = 3, d = 14$ )

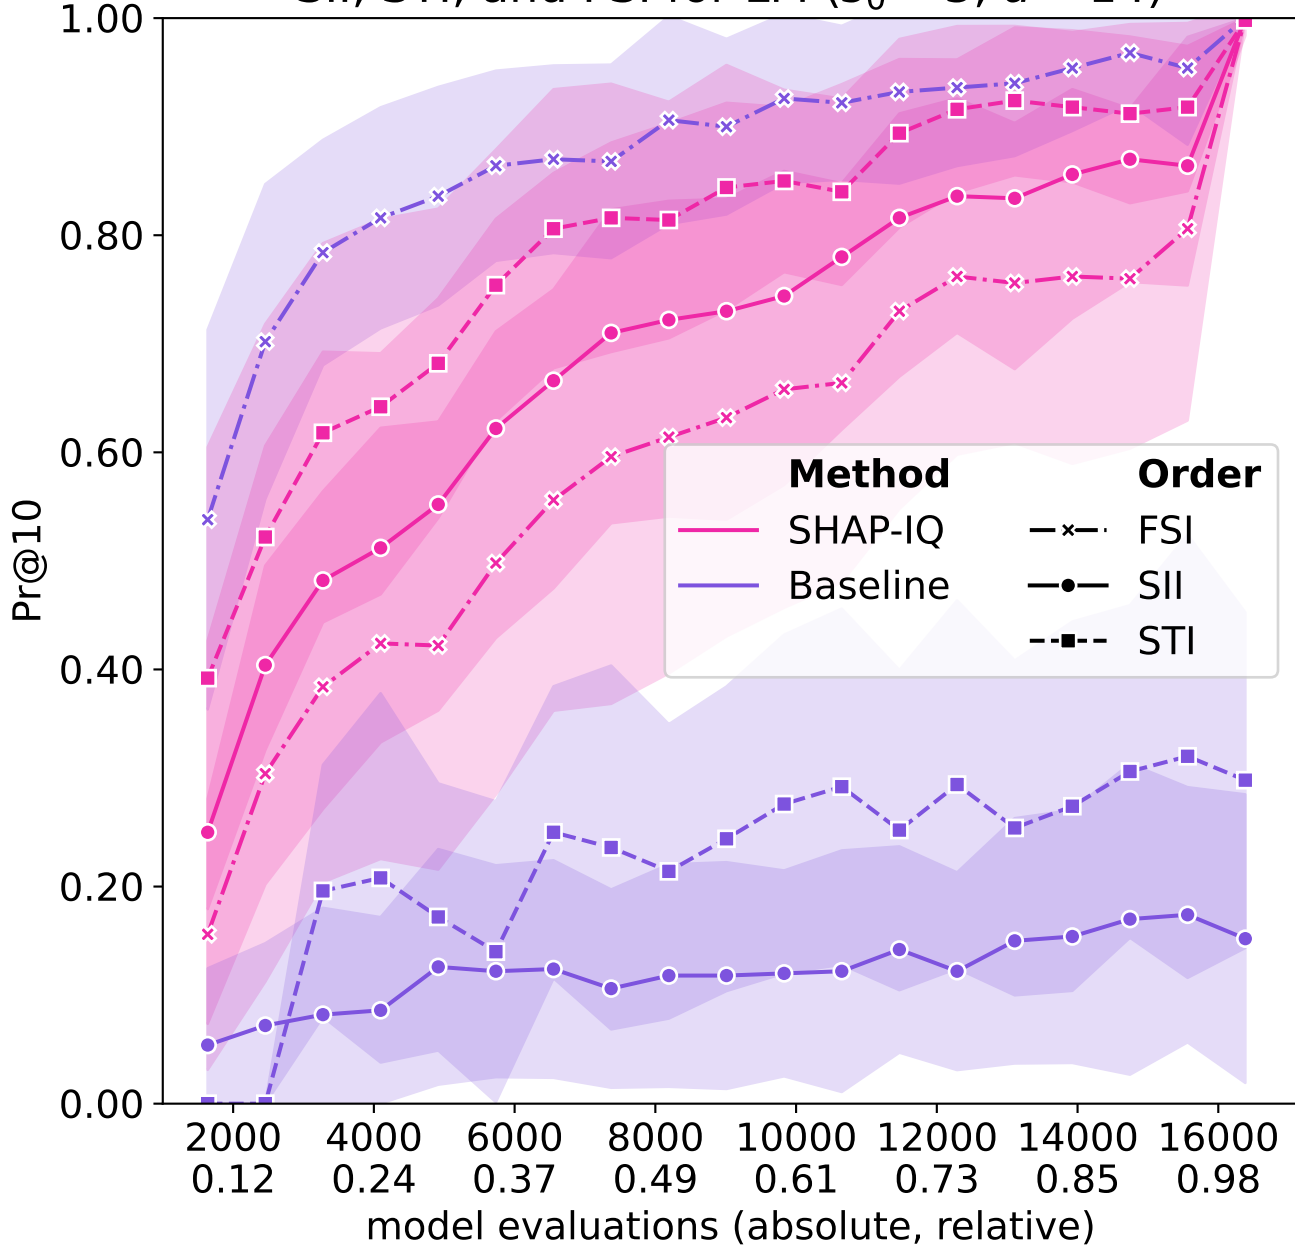

Supplement: supplementary_material [file attachment]

SII, STI, and FSI for SOUM ( $s_0 = 2$ ,  $d = 30$ )

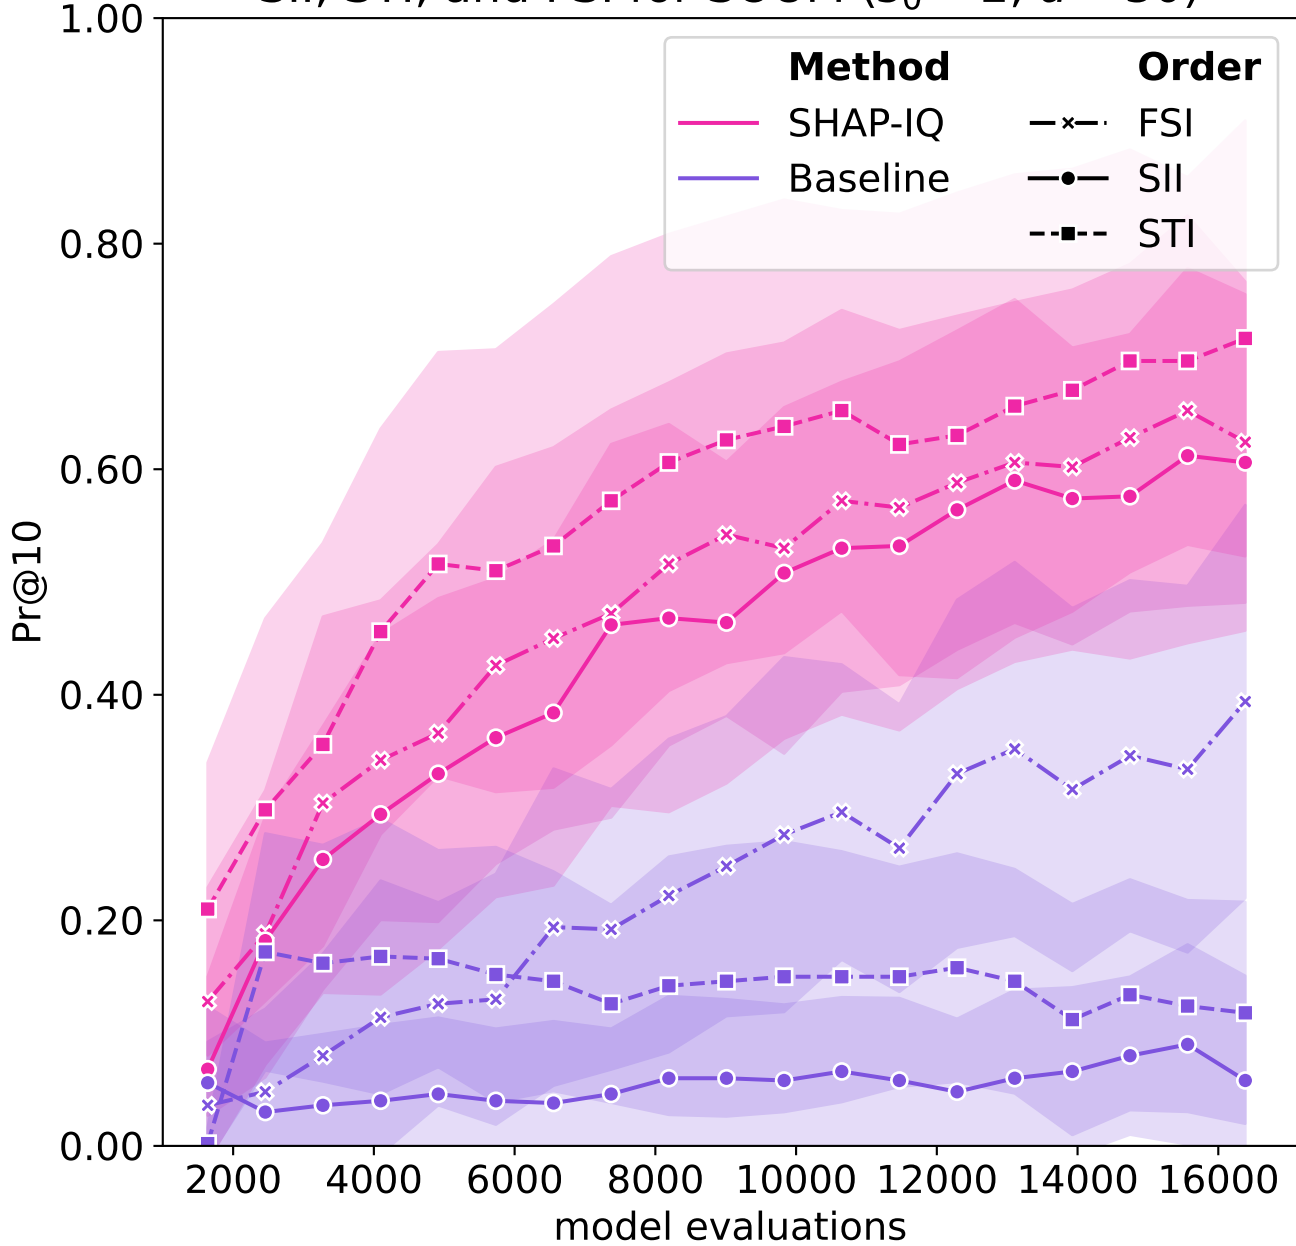

Supplement: supplementary_material [file attachment]

SII, STI, and FSI for LM ( $s_0 = 4, d = 14$ )

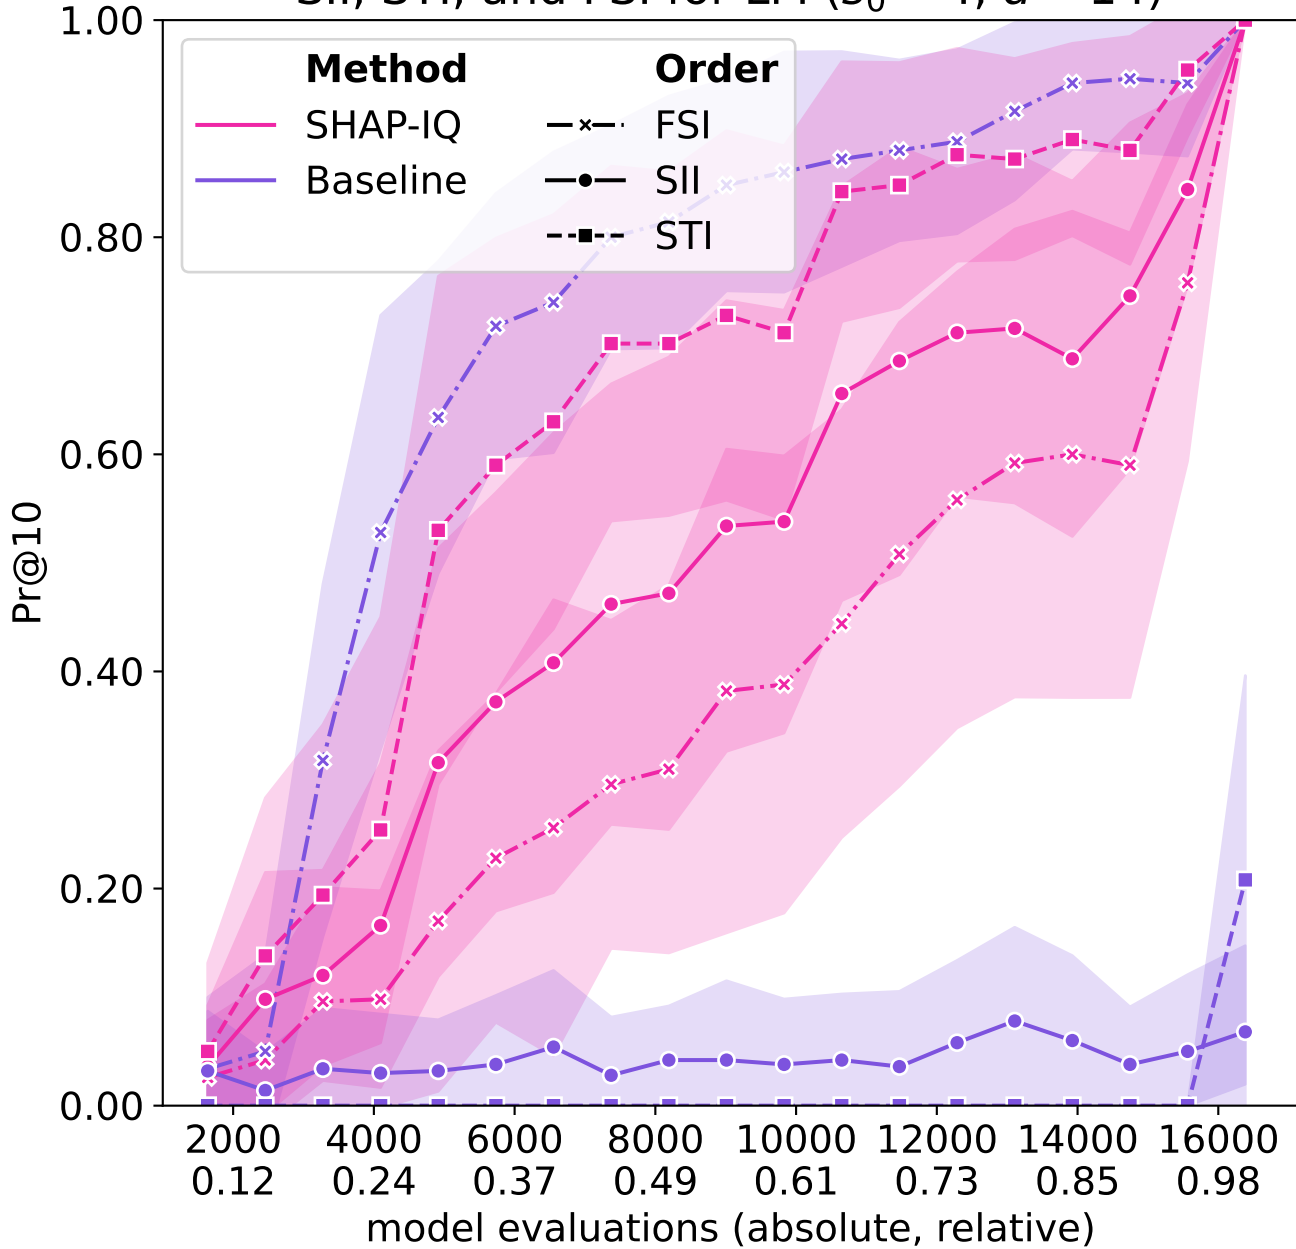

Supplement: supplementary_material [file attachment]

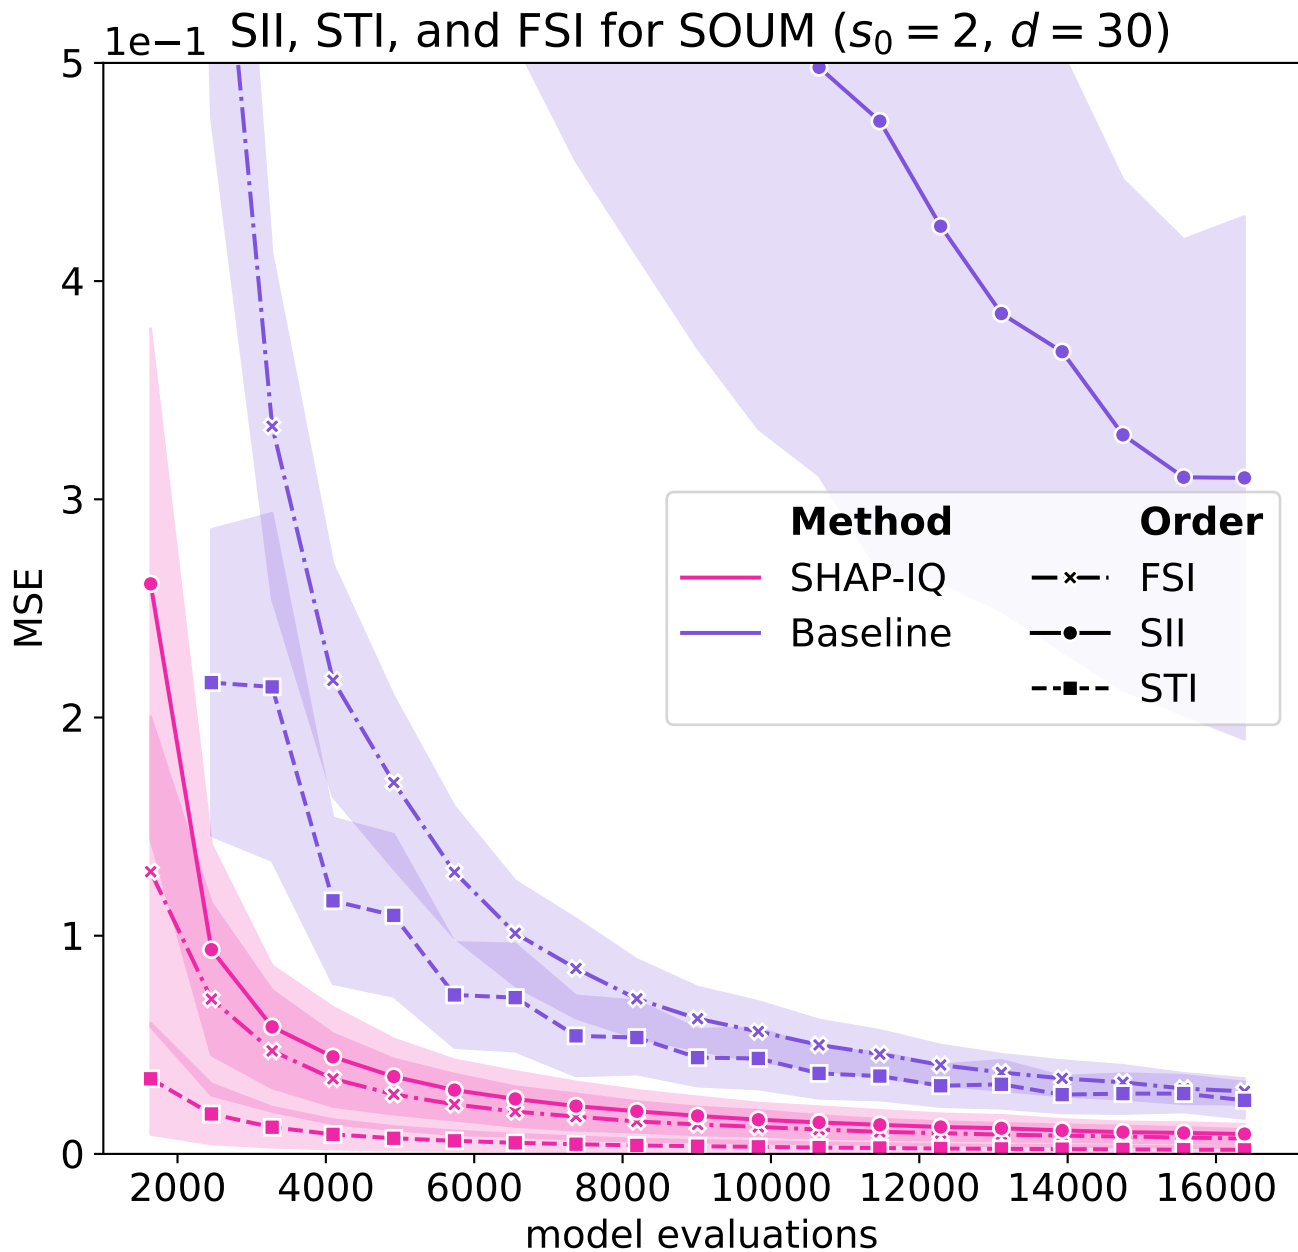

Supplement: supplementary_material [file attachment]

SII, STI, and FSI for LM ( $s_0 = 2$ ,  $d = 14$ )

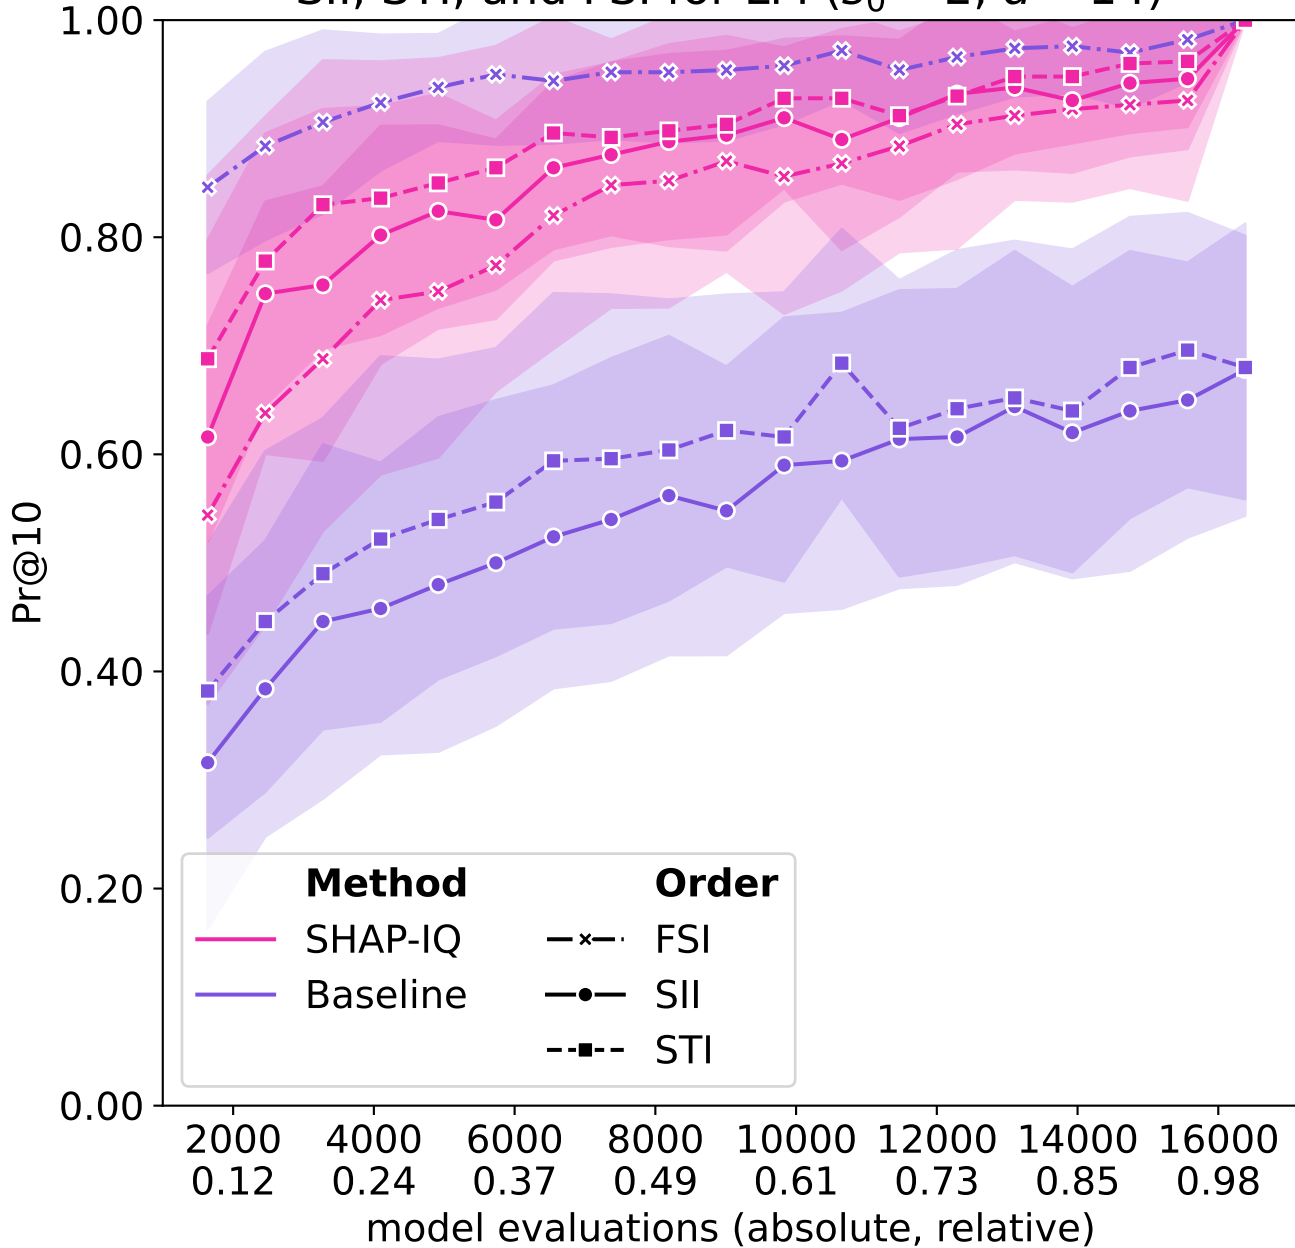

Supplement: supplementary_material [file attachment]

$1e-4$  SII, STI, and FSI for ICM ( $s_0 = 1$ ,  $d = 14$ )

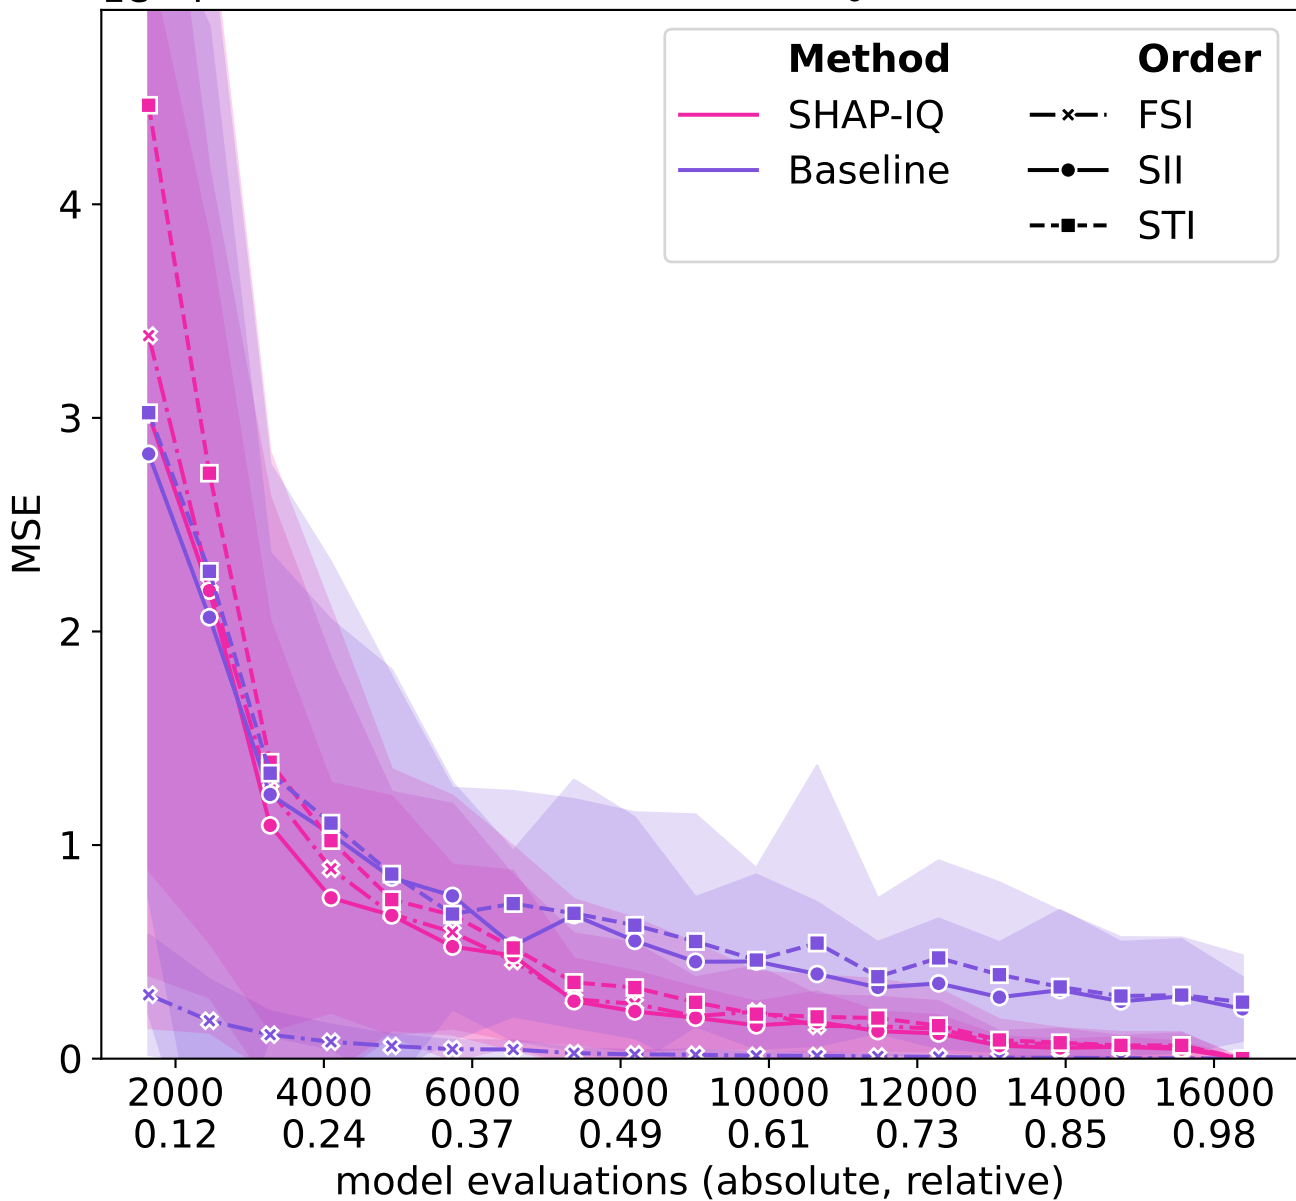

Supplement: supplementary_material [file attachment]

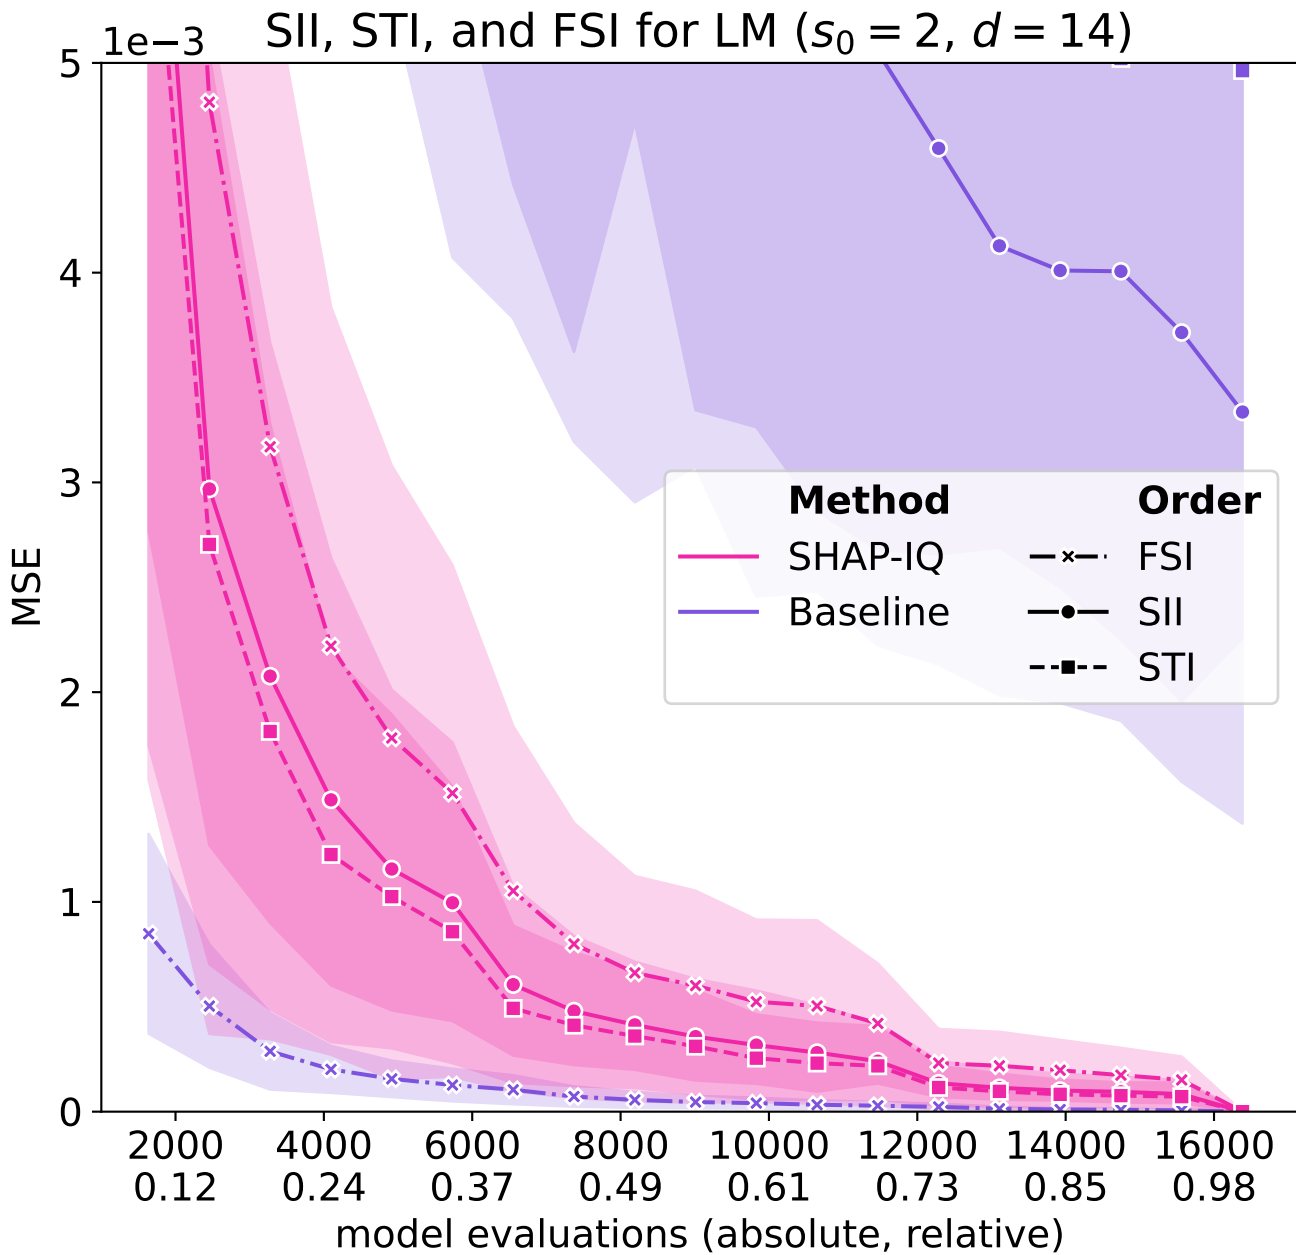

Supplement: supplementary_material [file attachment]

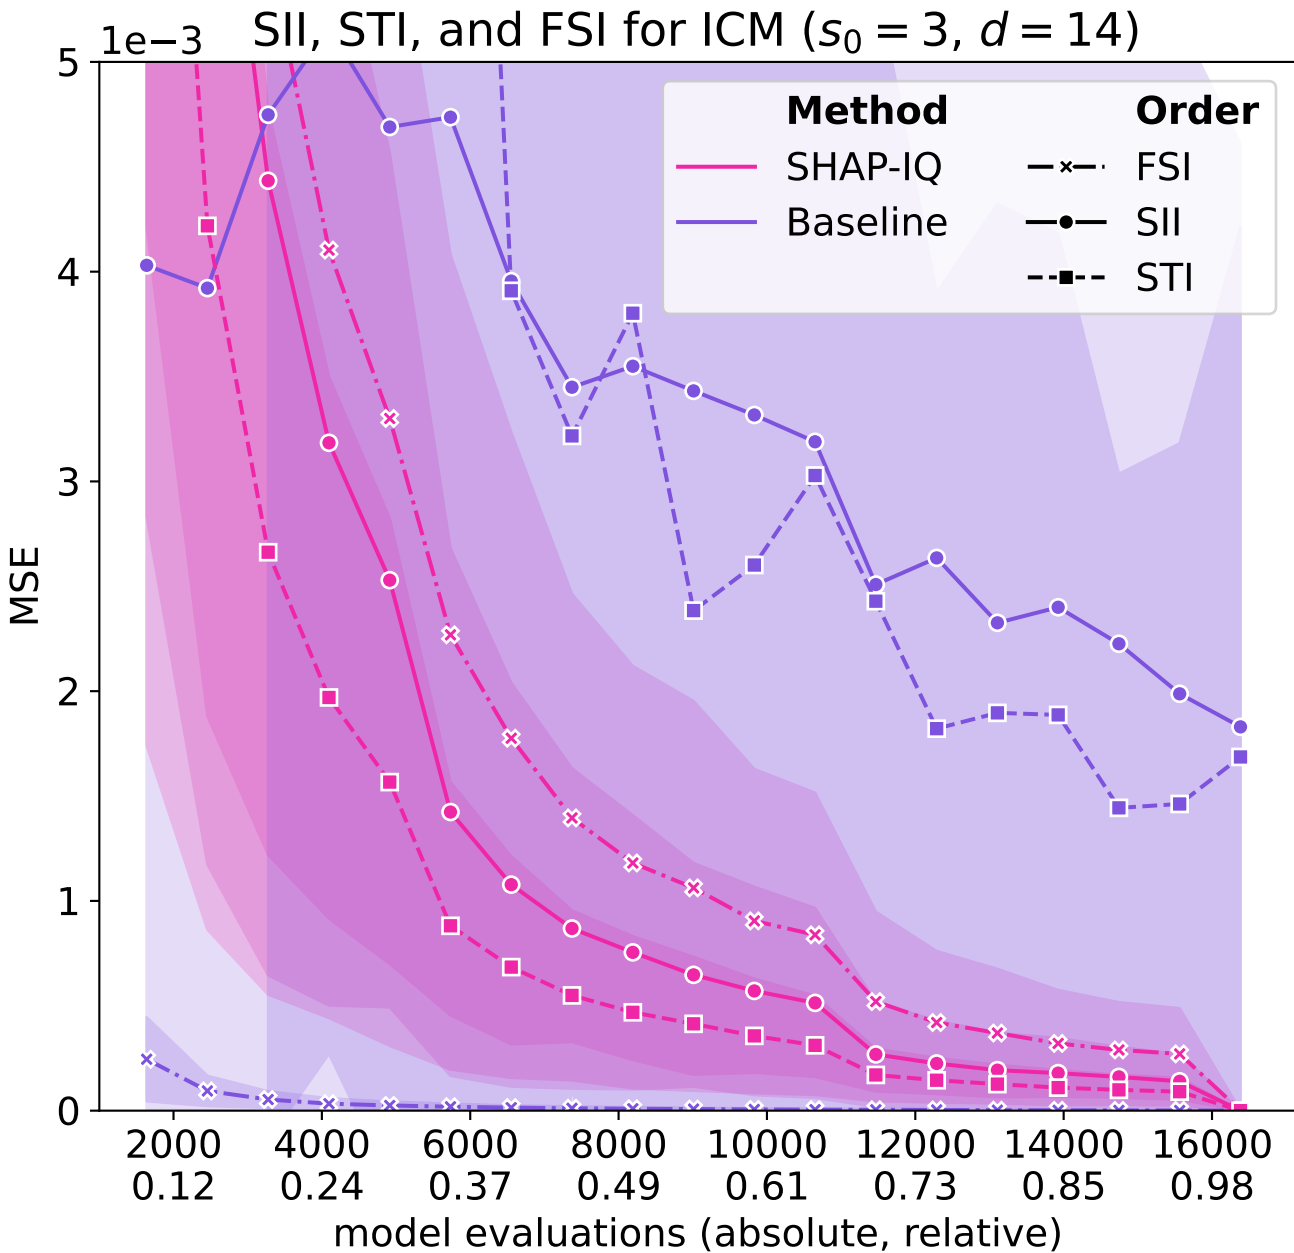

Supplement: supplementary_material [file attachment]

$1e-3$  SII, STI, and FSI for ICM ( $s_0 = 2$ ,  $d = 14$ )

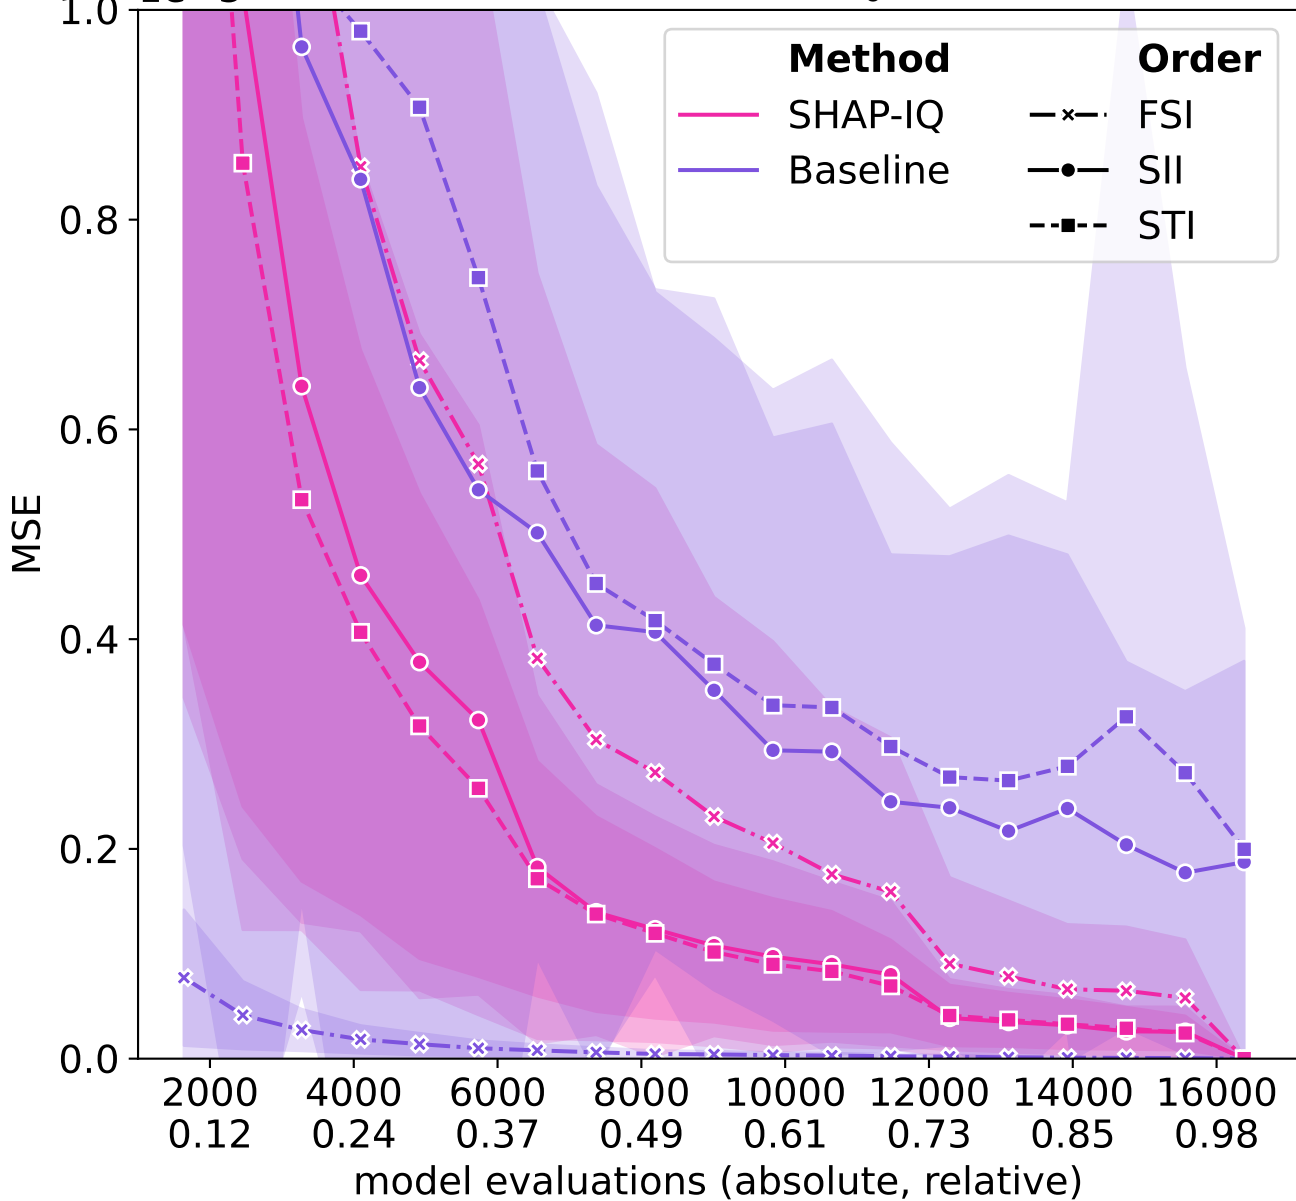

Supplement: supplementary_material [file attachment]

1e-1 SII, STI, and FSI for LM ( $s_0 = 4$ ,  $d = 14$ )

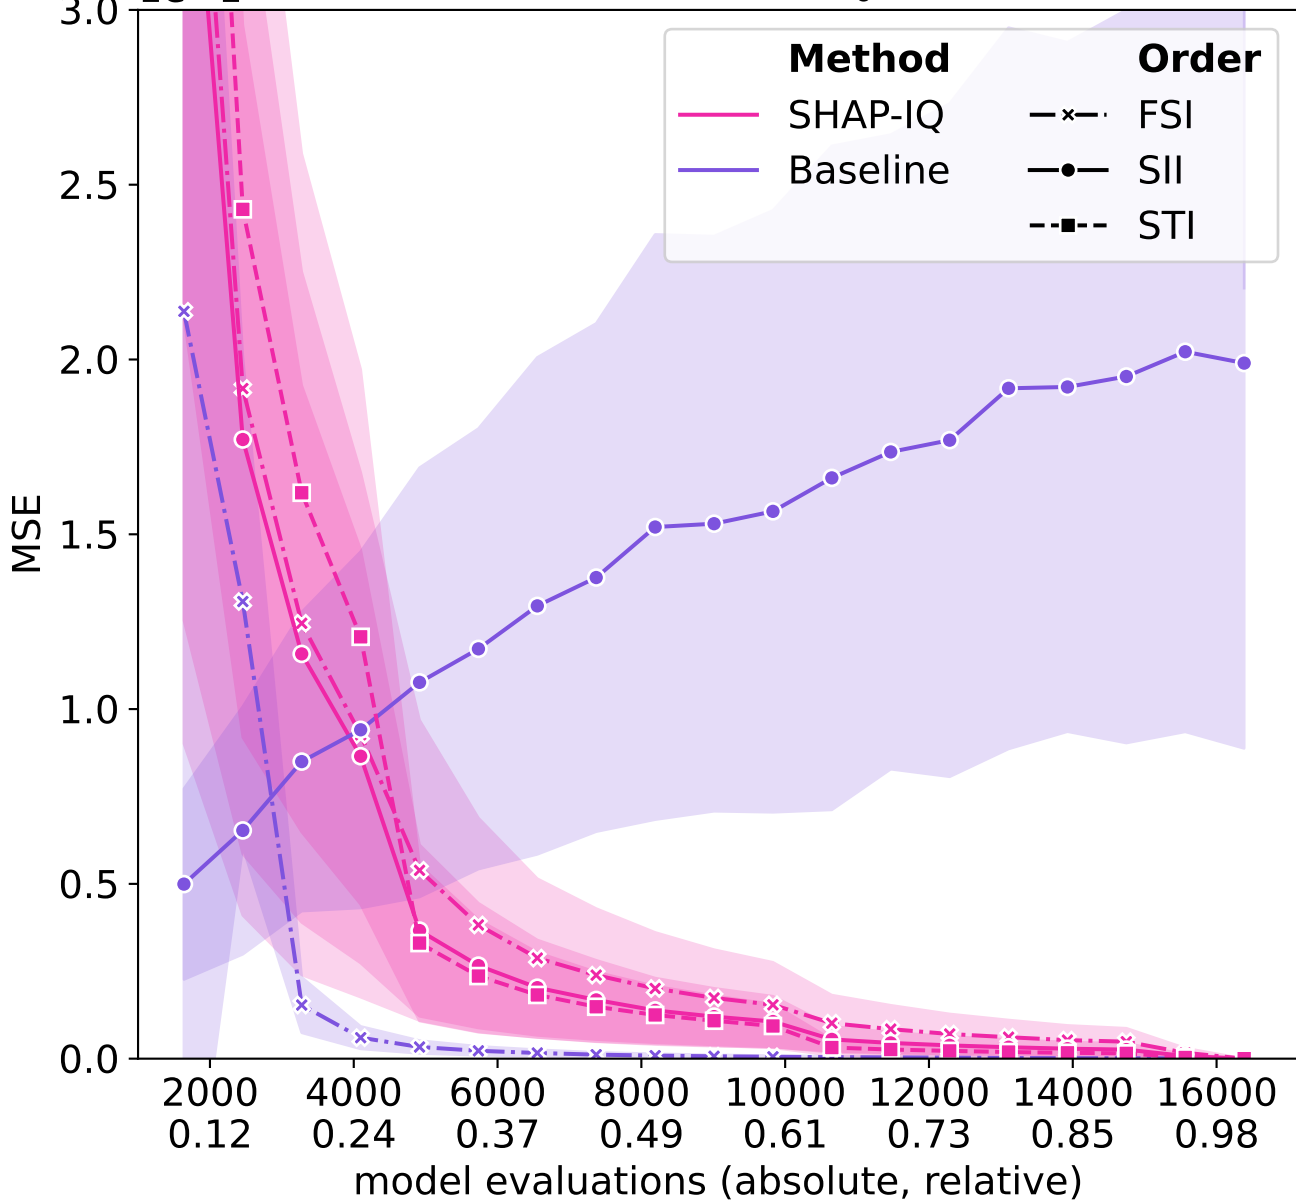

Supplement: supplementary_material [file attachment]

$1e^{-2}$  SII, STI, and FSI for LM ( $s_0 = 2$ ,  $d = 14$ )

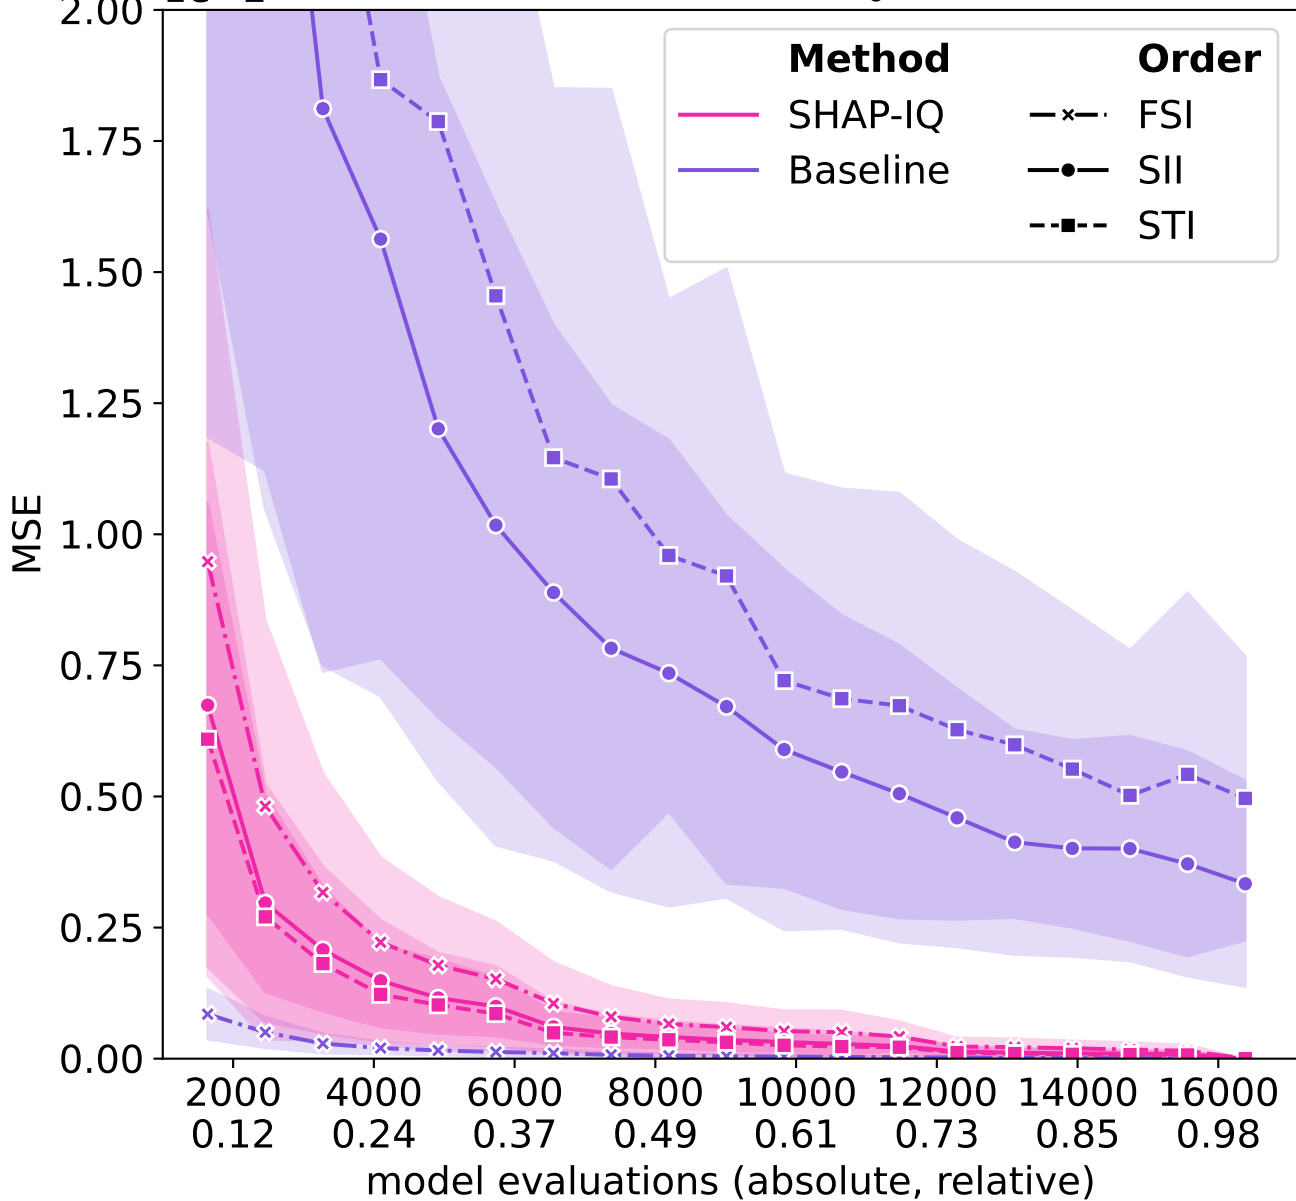

Supplement: supplementary_material [file attachment]

1e-2 SII, STI, and FSI for ICM ( $s_0 = 4$ ,  $d = 14$ )

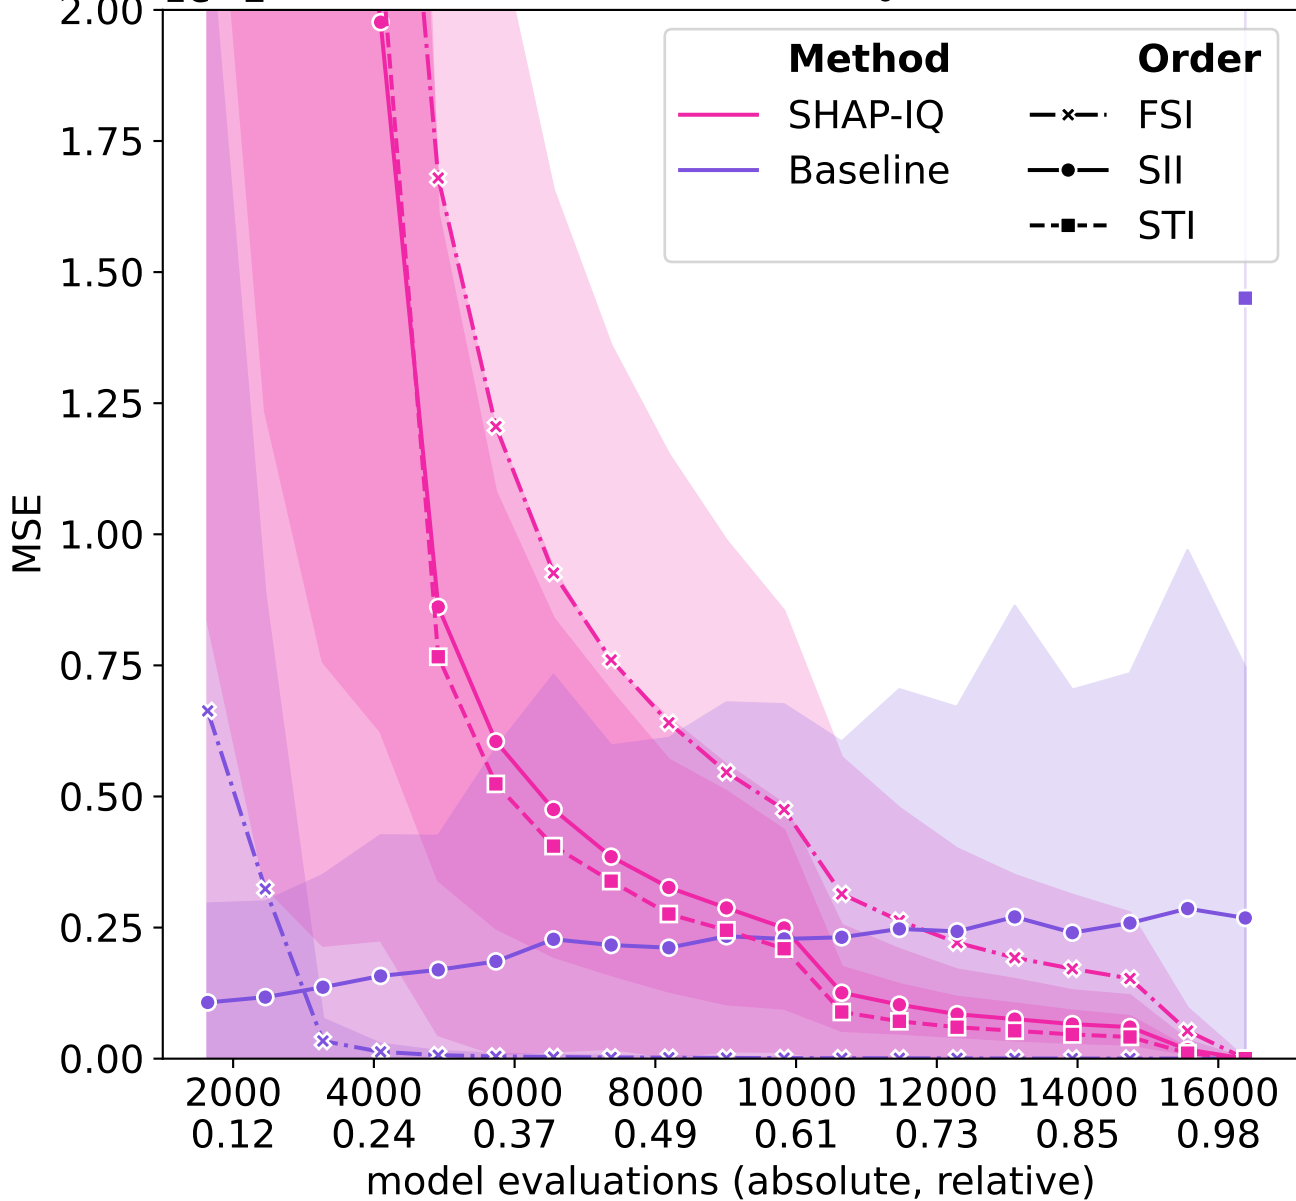

Supplement: supplementary_material [file attachment]

1e-1 SII, STI, and FSI for LM ( $s_0 = 3$ ,  $d = 14$ )

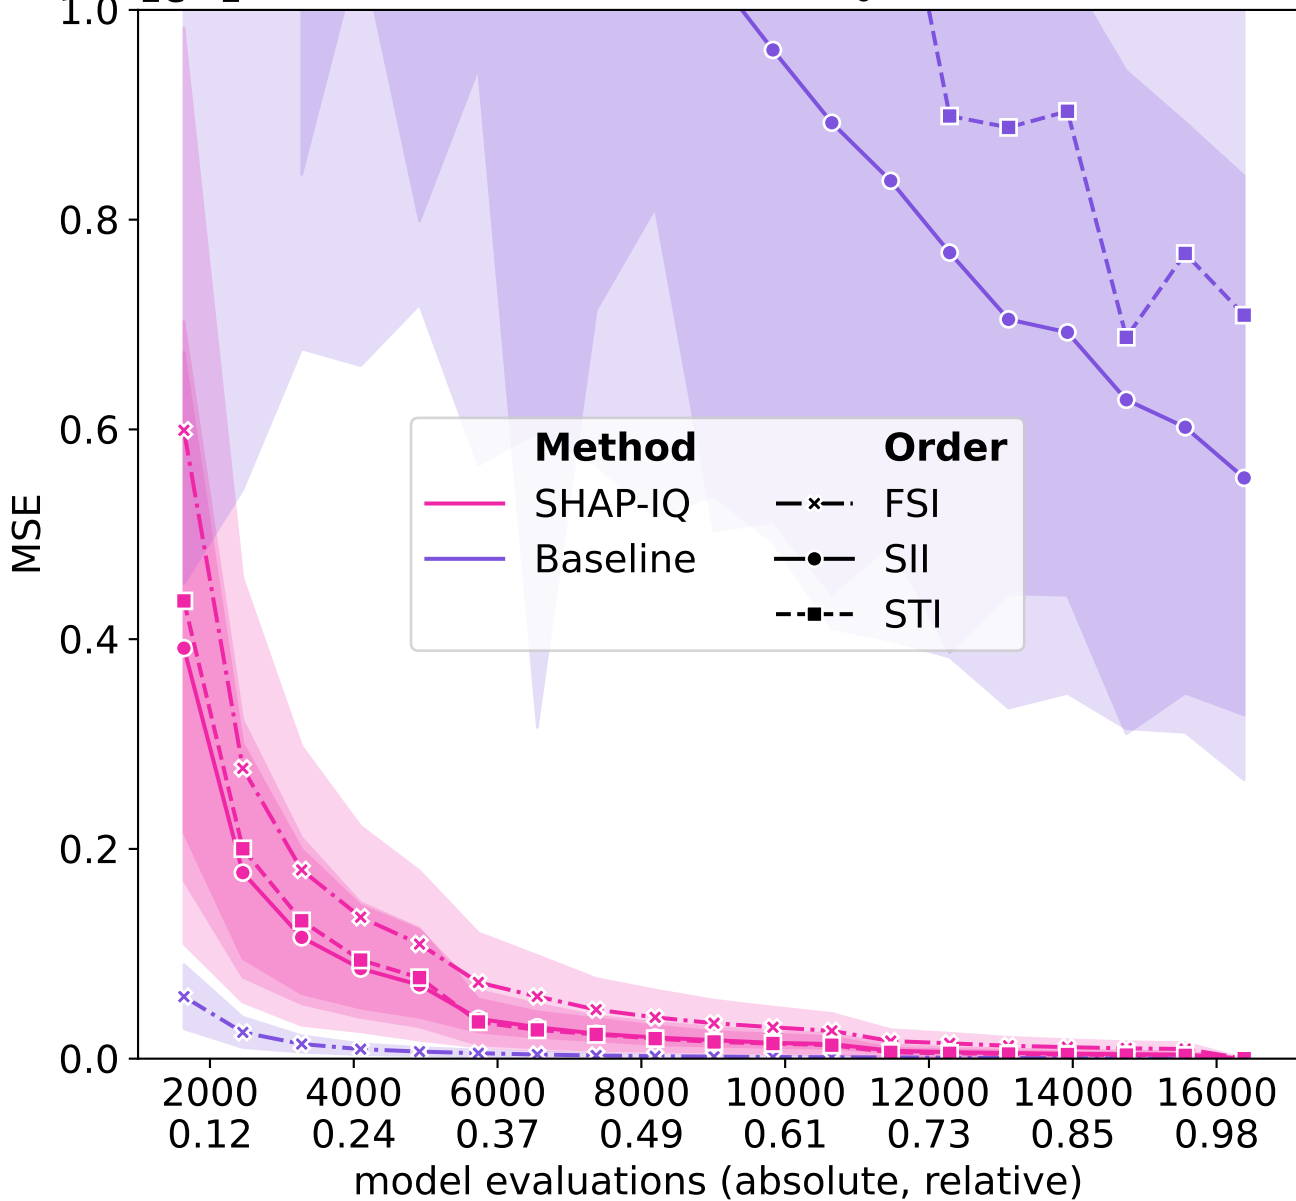

Supplement: supplementary_material [file attachment]

SII, STI, and FSI for SOUM ( $s_0 = 2$ ,  $d = 30$ )

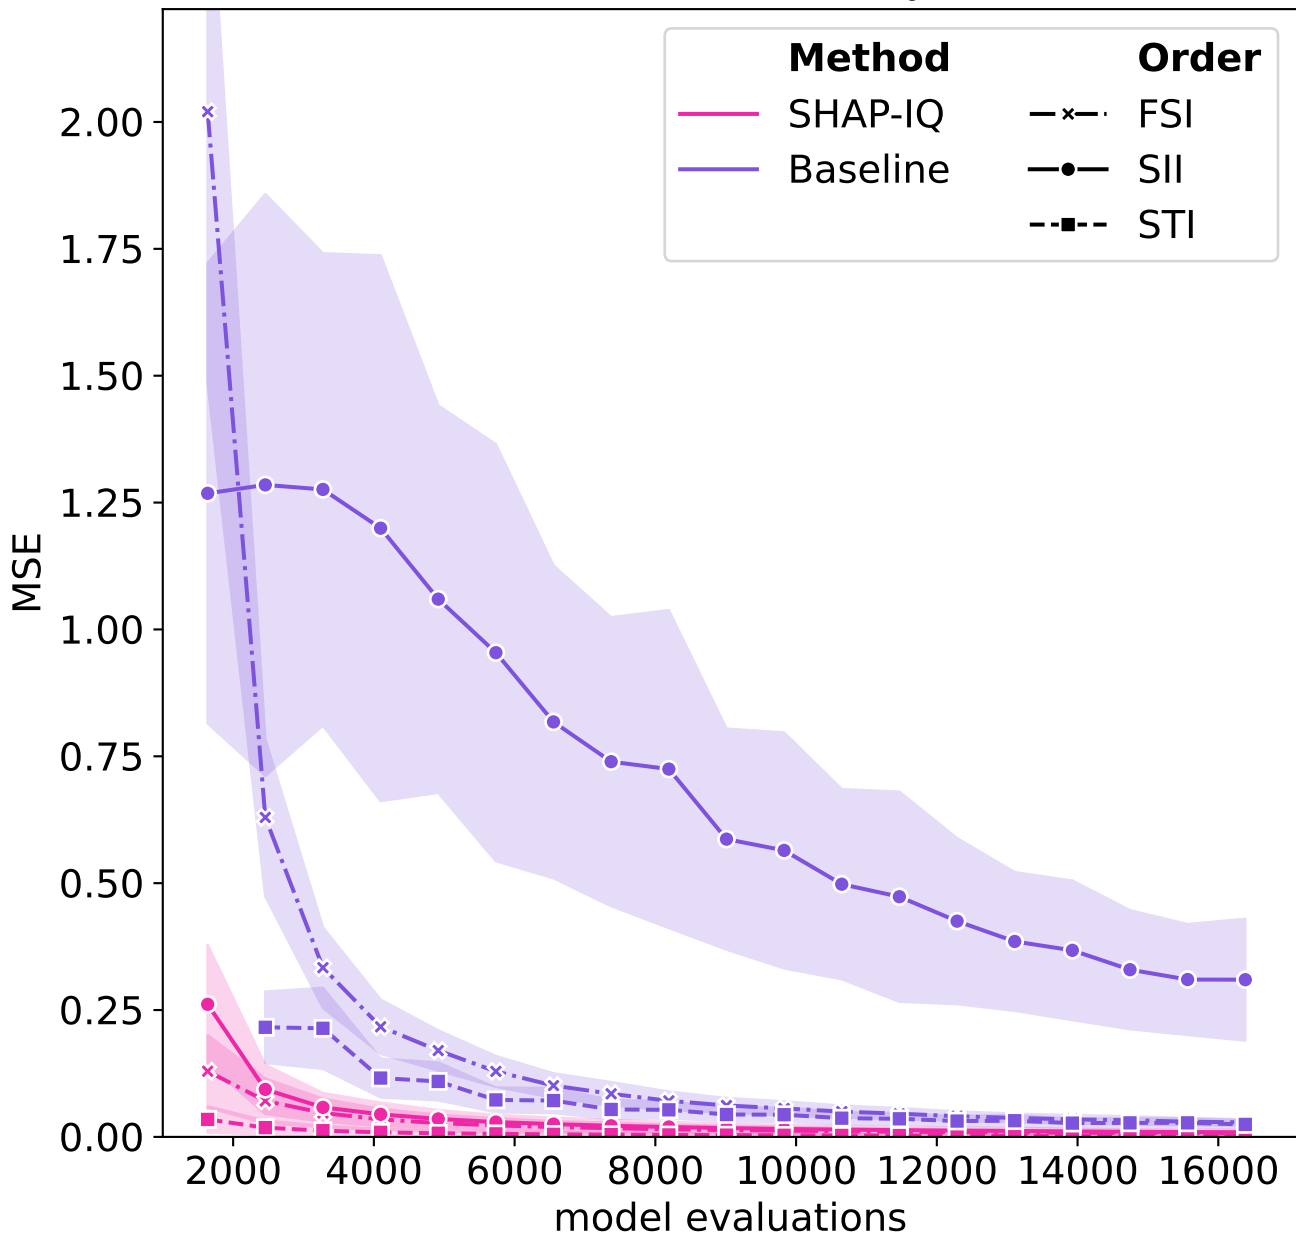

Supplement: supplementary_material [file attachment]

SII, STI, and FSI for ICM ( $s_0 = 3$ ,  $d = 14$ )

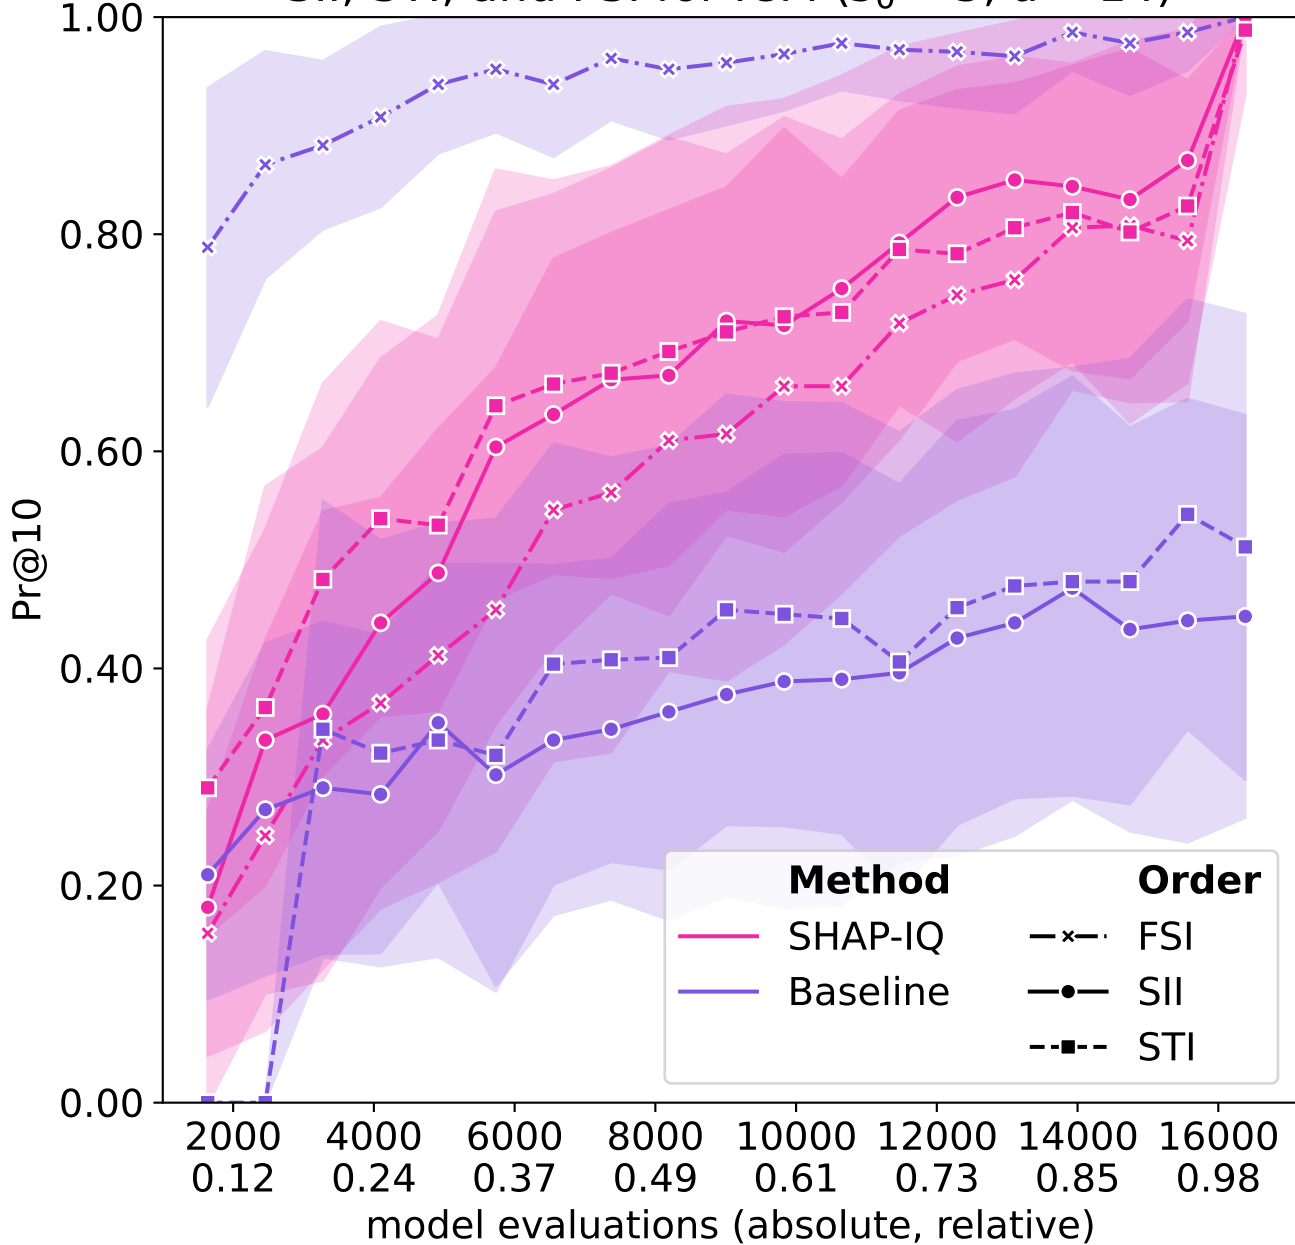

Supplement: supplementary_material [file attachment]

SII, STI, and FSI for ICM ( $s_0 = 4$ ,  $d = 14$ )

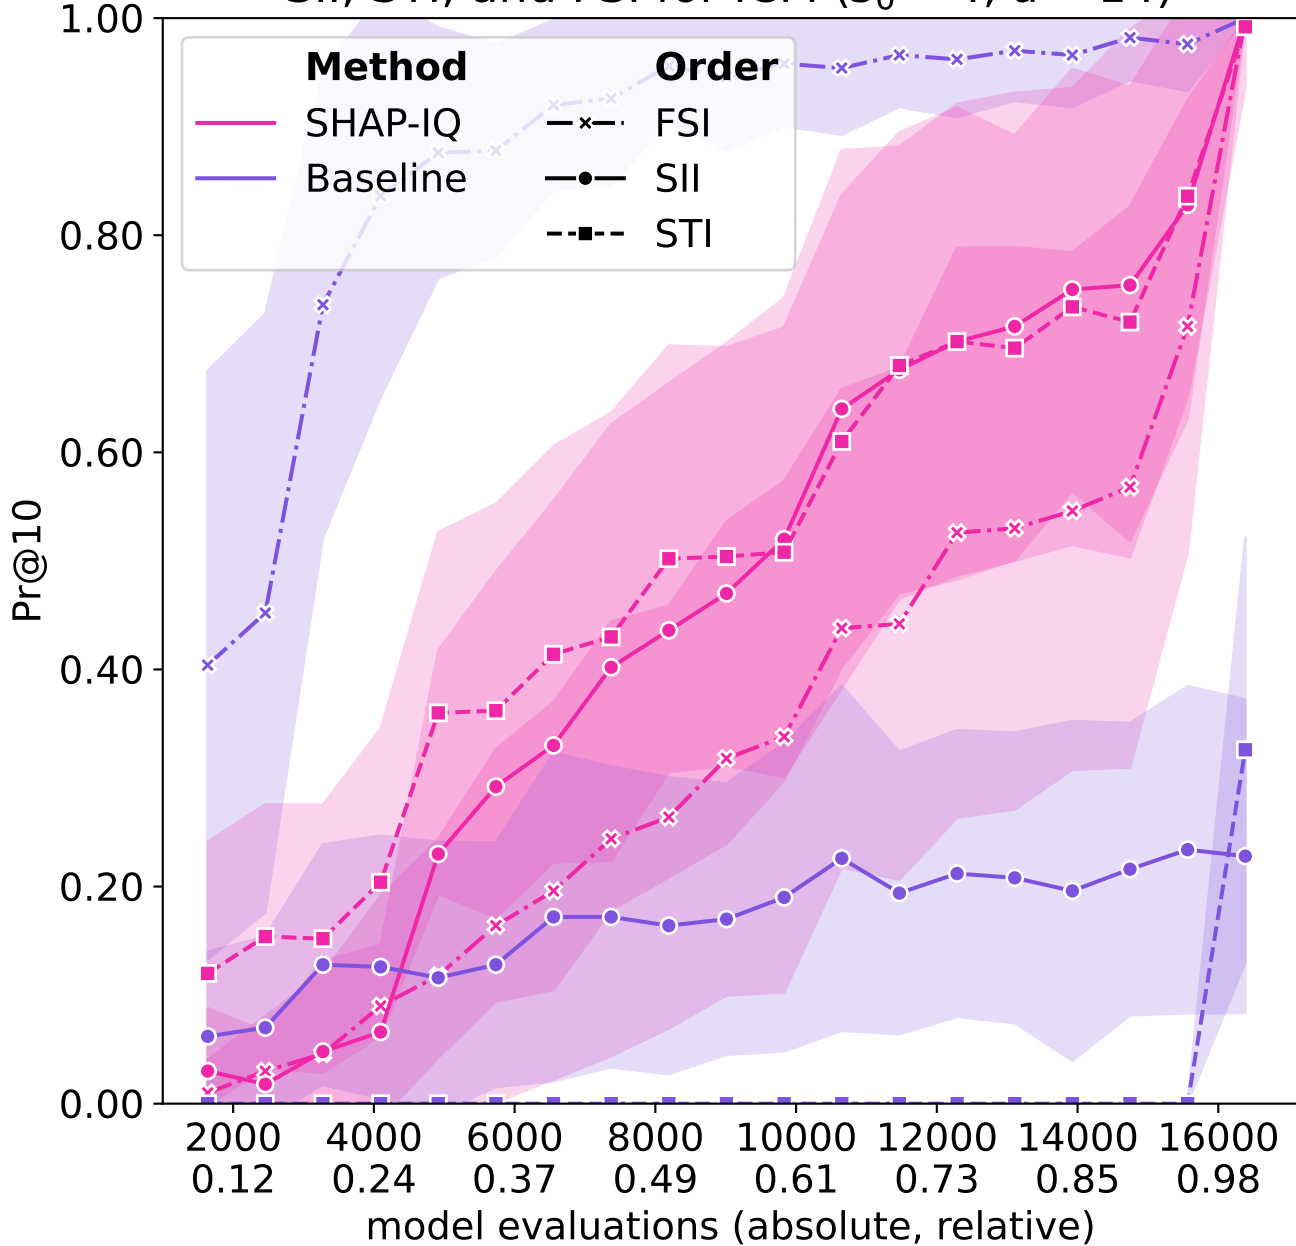

Supplement: supplementary_material [file attachment]

1e-1 SII, STI, and FSI for LM ( $s_0 = 4$ ,  $d = 14$ )

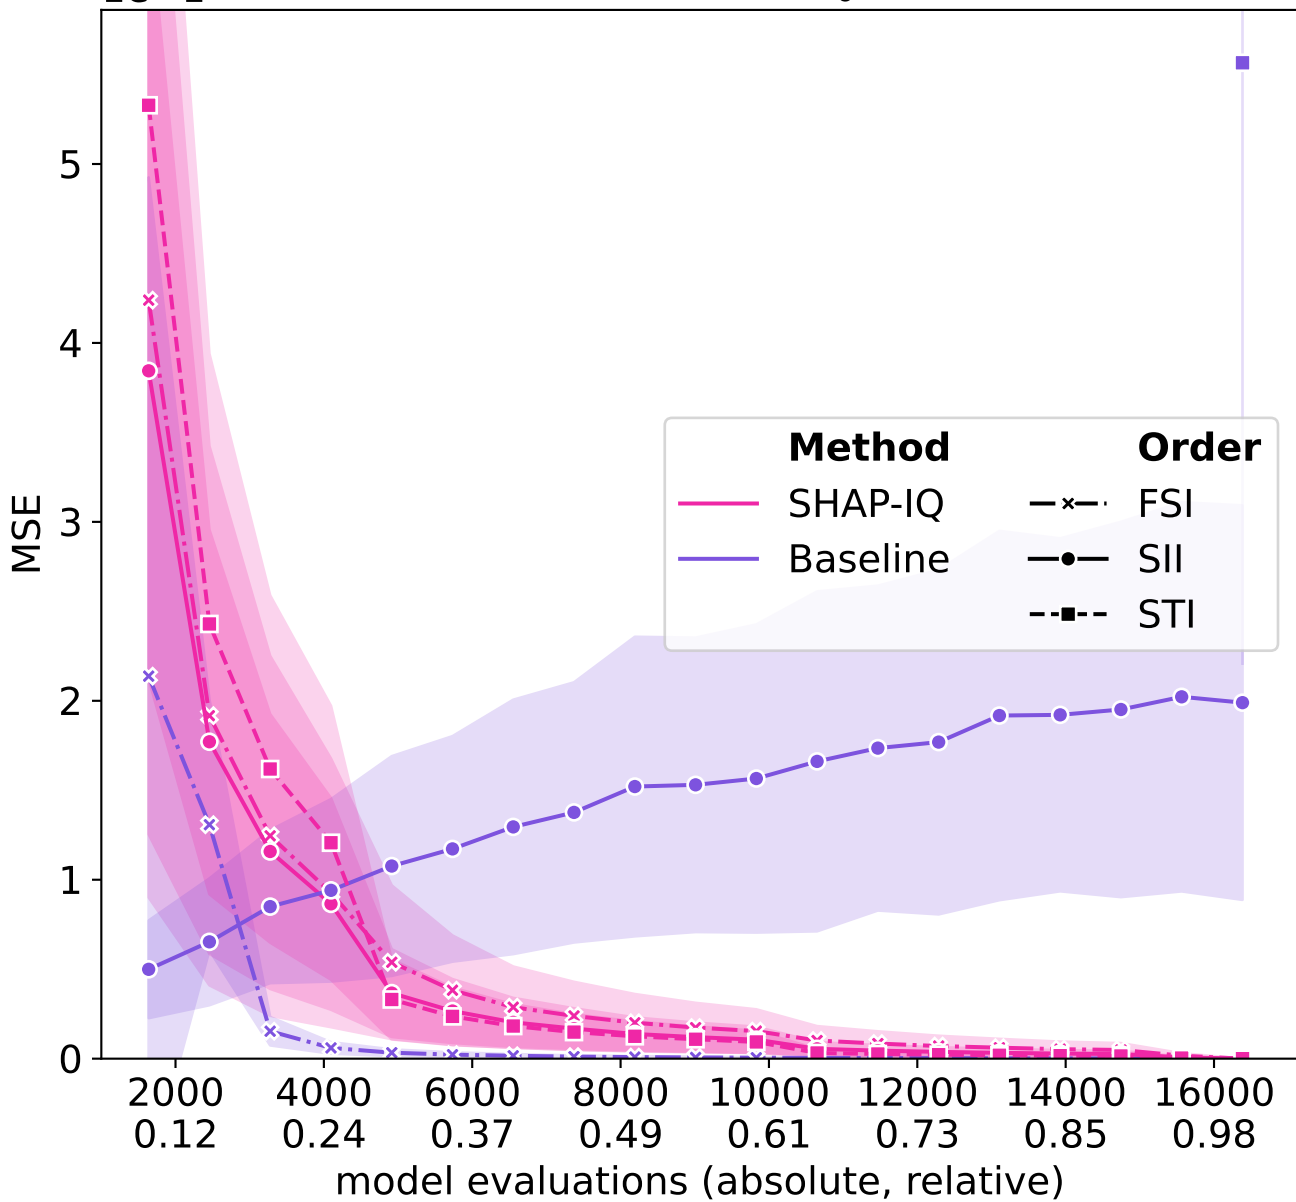

Supplement: supplementary_material [file attachment]

SII, STI, and FSI for ICM ( $s_0 = 4$ ,  $d = 14$ )

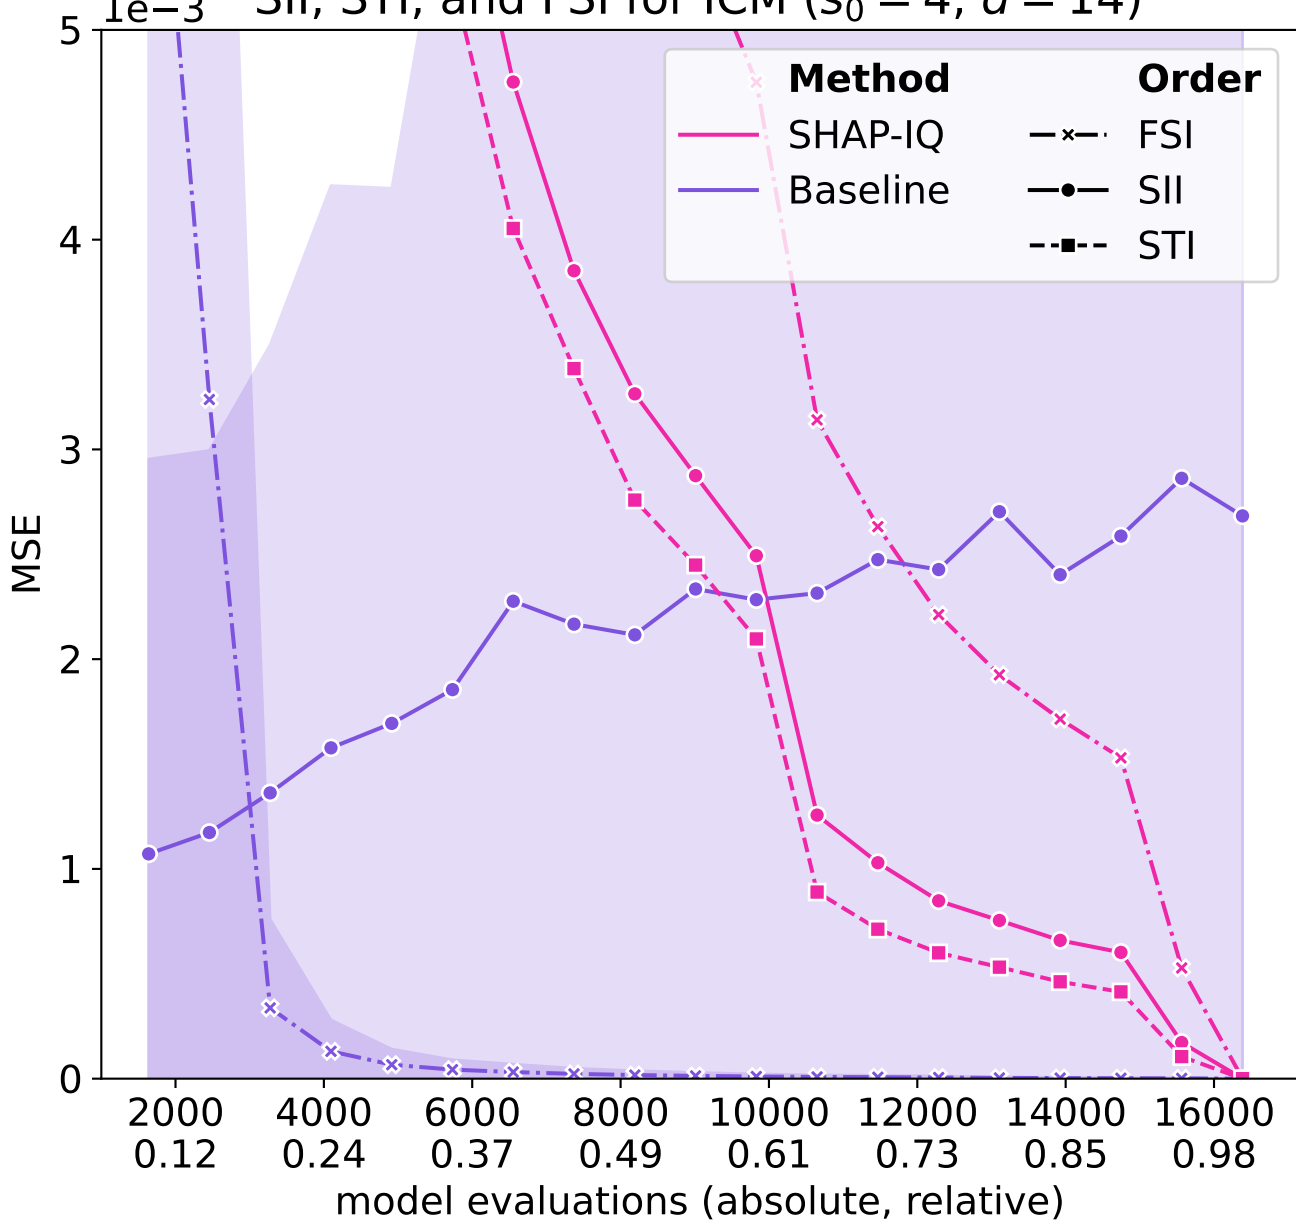

Supplement: supplementary_material [file attachment]

SII, STI, and FSI for ICM ( $s_0 = 2$ ,  $d = 14$ )

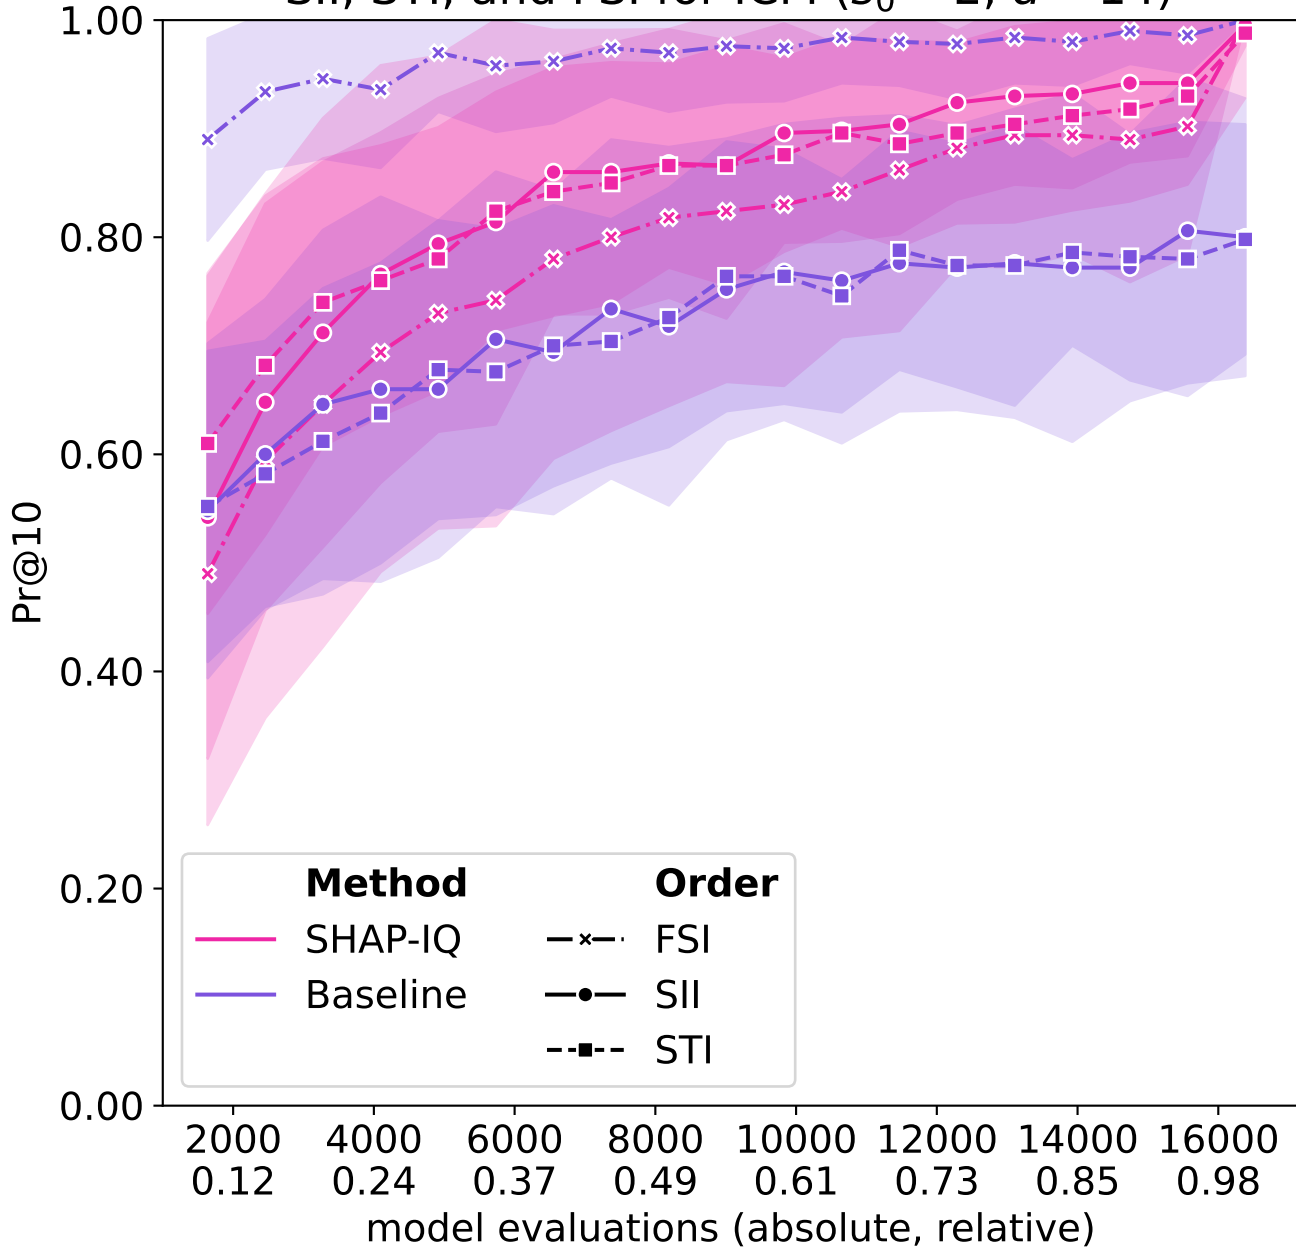

Supplement: supplementary_material [file attachment]

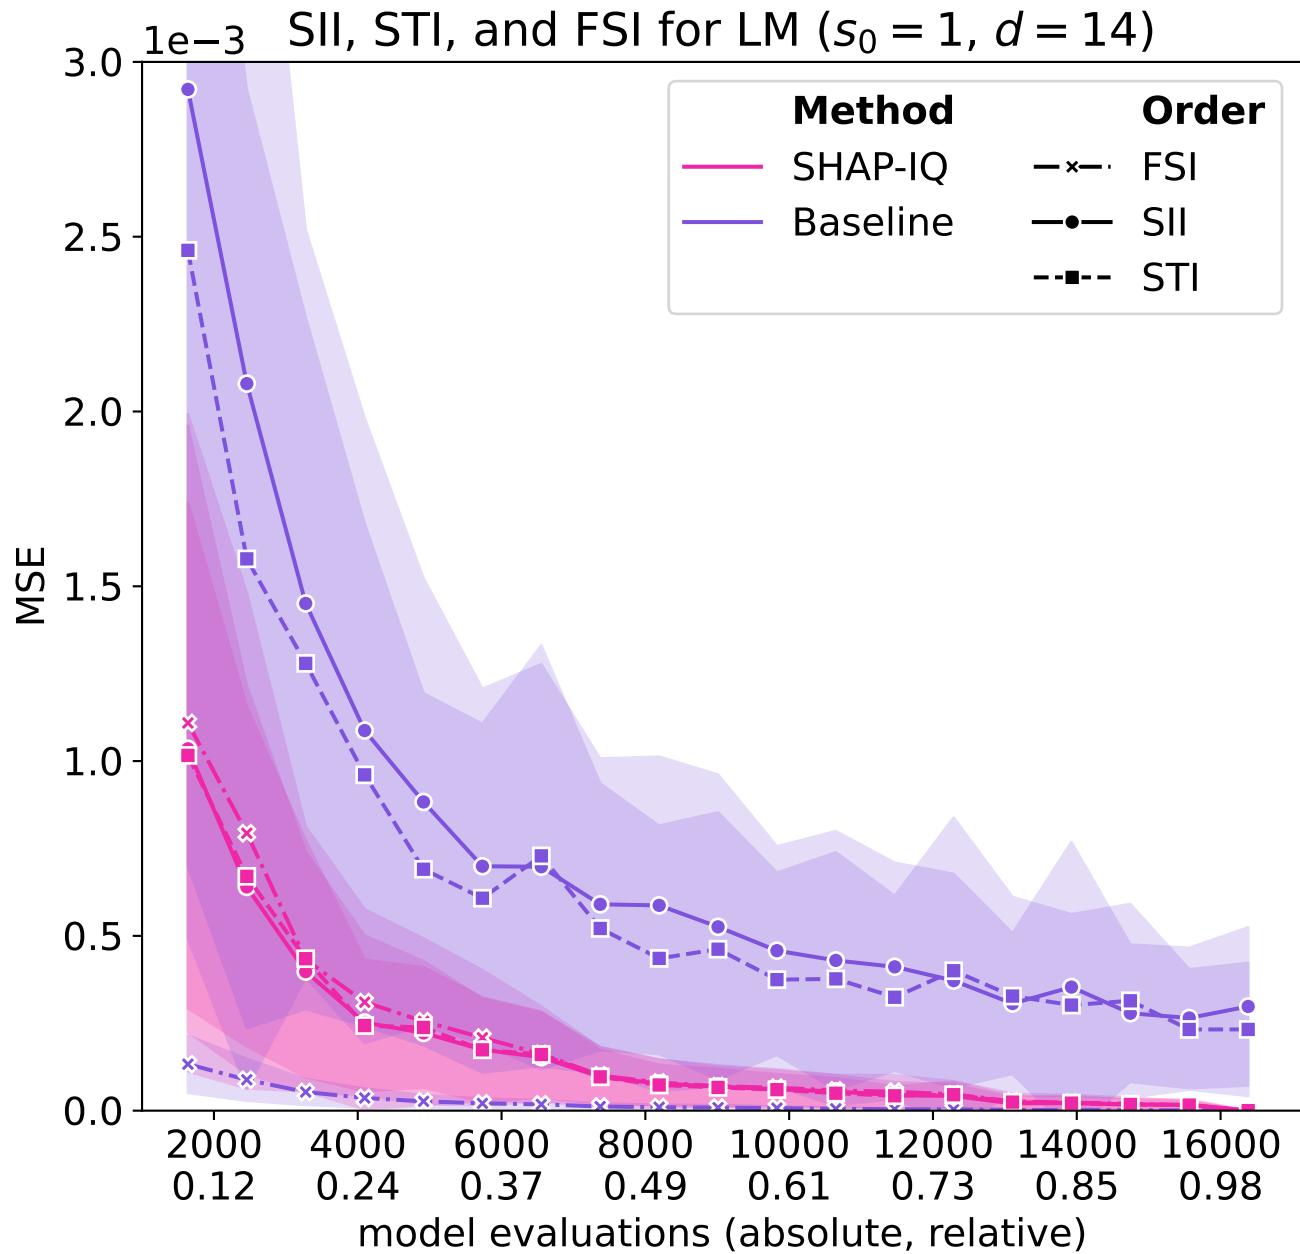

Supplement: supplementary_material [file attachment]

$1e^{-2}$  SII, STI, and FSI for ICM ( $s_0 = 3$ ,  $d = 14$ )

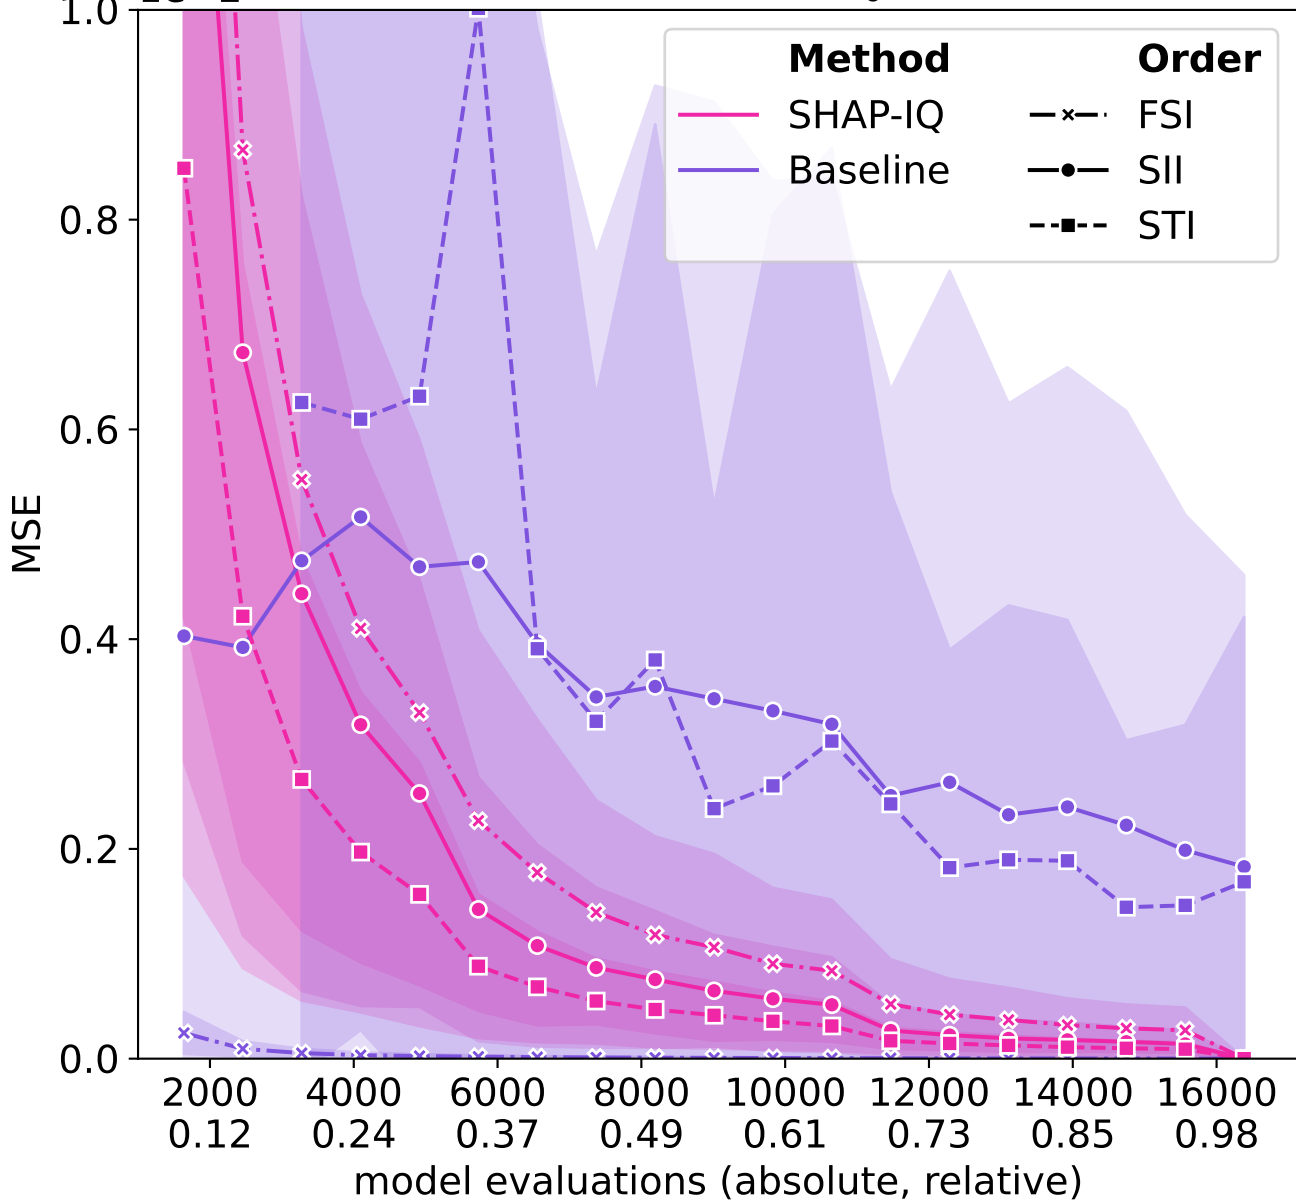

Supplement: supplementary_material [file attachment]
